# Supplementary material for: Sensory Traits and Consumer’s Perceived Quality of Traditional and Modern Fresh Market Tomato Varieties: A Study in Three European Countries
Source: MDPI journal article supplement (doi:10.3390/foods10112521), 2021-10-21
Supplement: s1 [file s1]

## **SUPPLEMENTARY MATERIAL**

### **Sensory traits and consumer's perceived quality of traditional and modern fresh market tomato varieties: a Study in three European countries**

Fiorella Sinesio, Maria Cammareri, Valentine Cottet, Lilian Fontanet, Michel Jost, Elisabetta Moneta, Samuela Palombieri, Marina Peparaio, Roser Romero del Castillo, Eleonora Saggia Civitelli, Patrizia Spigno, Antonella Vitiello, Brigitte Navez, Joan Casals, Mathilde Causse, Antonio Granell, Silvana Grandillo

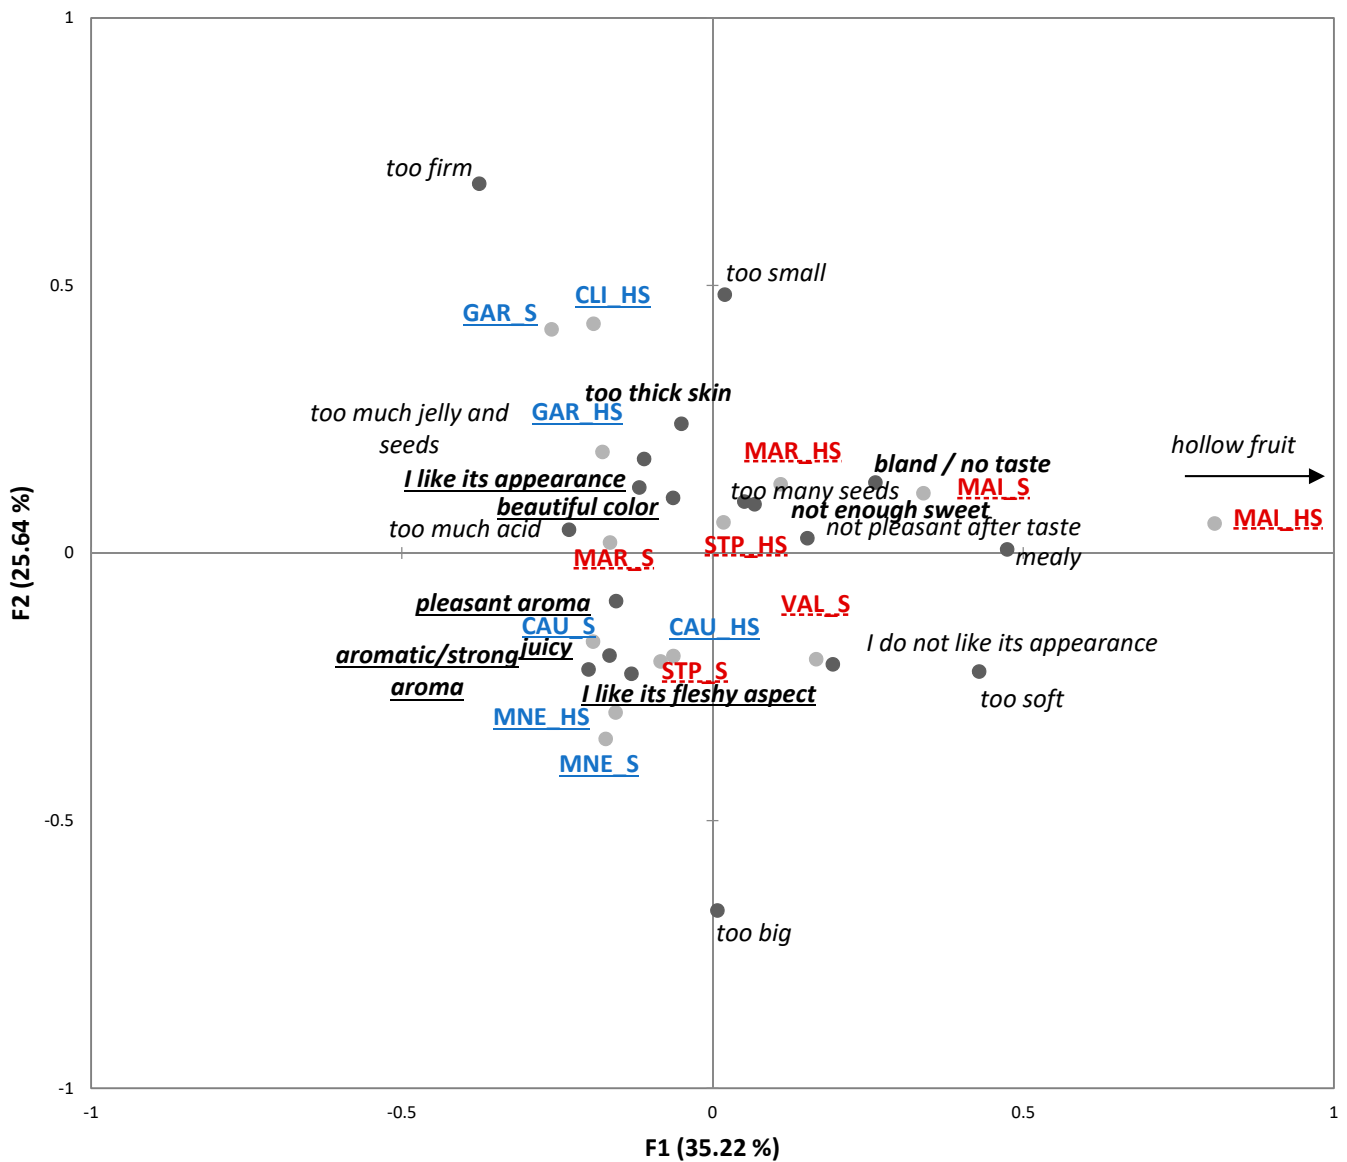

**Figure S1. Bi-plot resulting from Correspondence Analysis performed on frequency table of consumers' responses to Check-All-That-Apply (CATA) questions for tomatoes harvested at the red ripe stage in France.**

The items that have significant positive association with overall liking from a penalty-lift analysis are reported in bold italics and underlined; negative associations are reported in bold italics. Modern varieties are in blue, underlined with solid lines; Traditional varieties are in red, underlined with dashed lines. S= soil; HS=soilless.

Aurea (AUR), Cauralina (CAU), Climberley (CLI), Garance (GAR), HybInra (HYB) Maillane (MAI), Marbonne (MNE), Marmande (MAR), Pera de Girona (PDG), Pomodoro di Sorrento (PDS), St Pierre (STP), Valenciana (VAL)

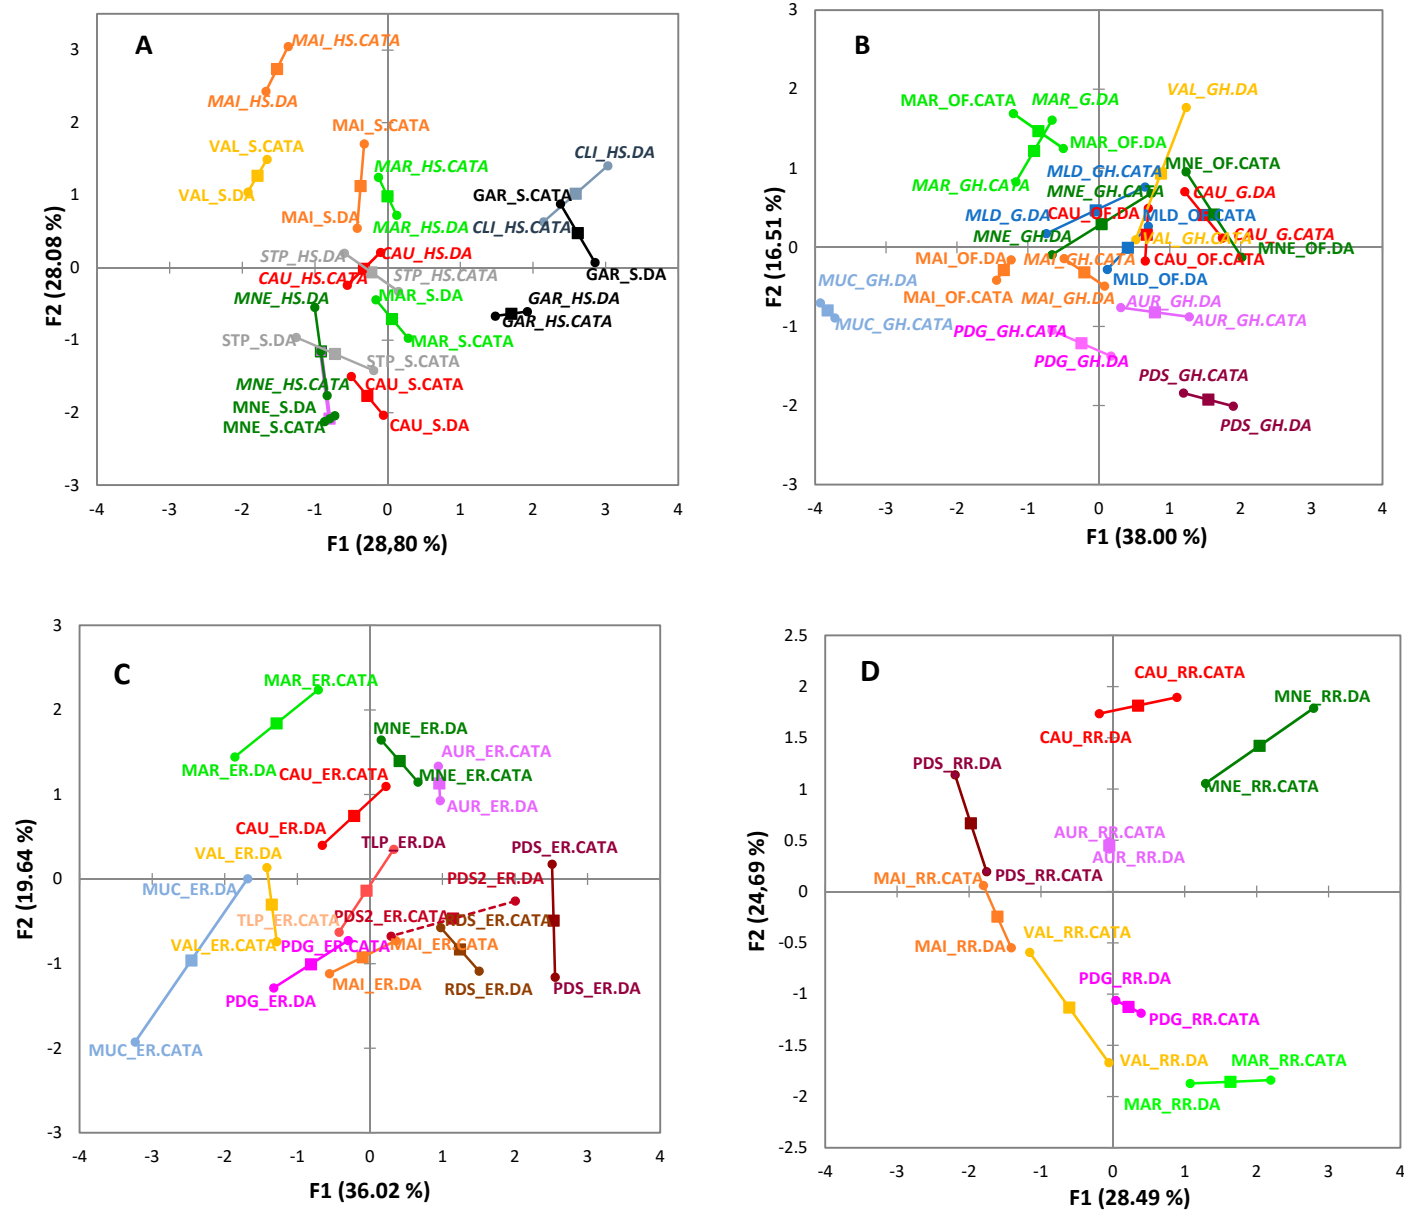

**Figure S2. Consensus MFA Maps with superimposed points from Descriptive analysis (DA) and CATA questions.**

A: France; B: Spain; C: Italy ER stage; D: Italy RR stage. S= Soil; HS=Soilless. GH=Greenhouse; OF=Open Field. Product codes are listed in Table 1.

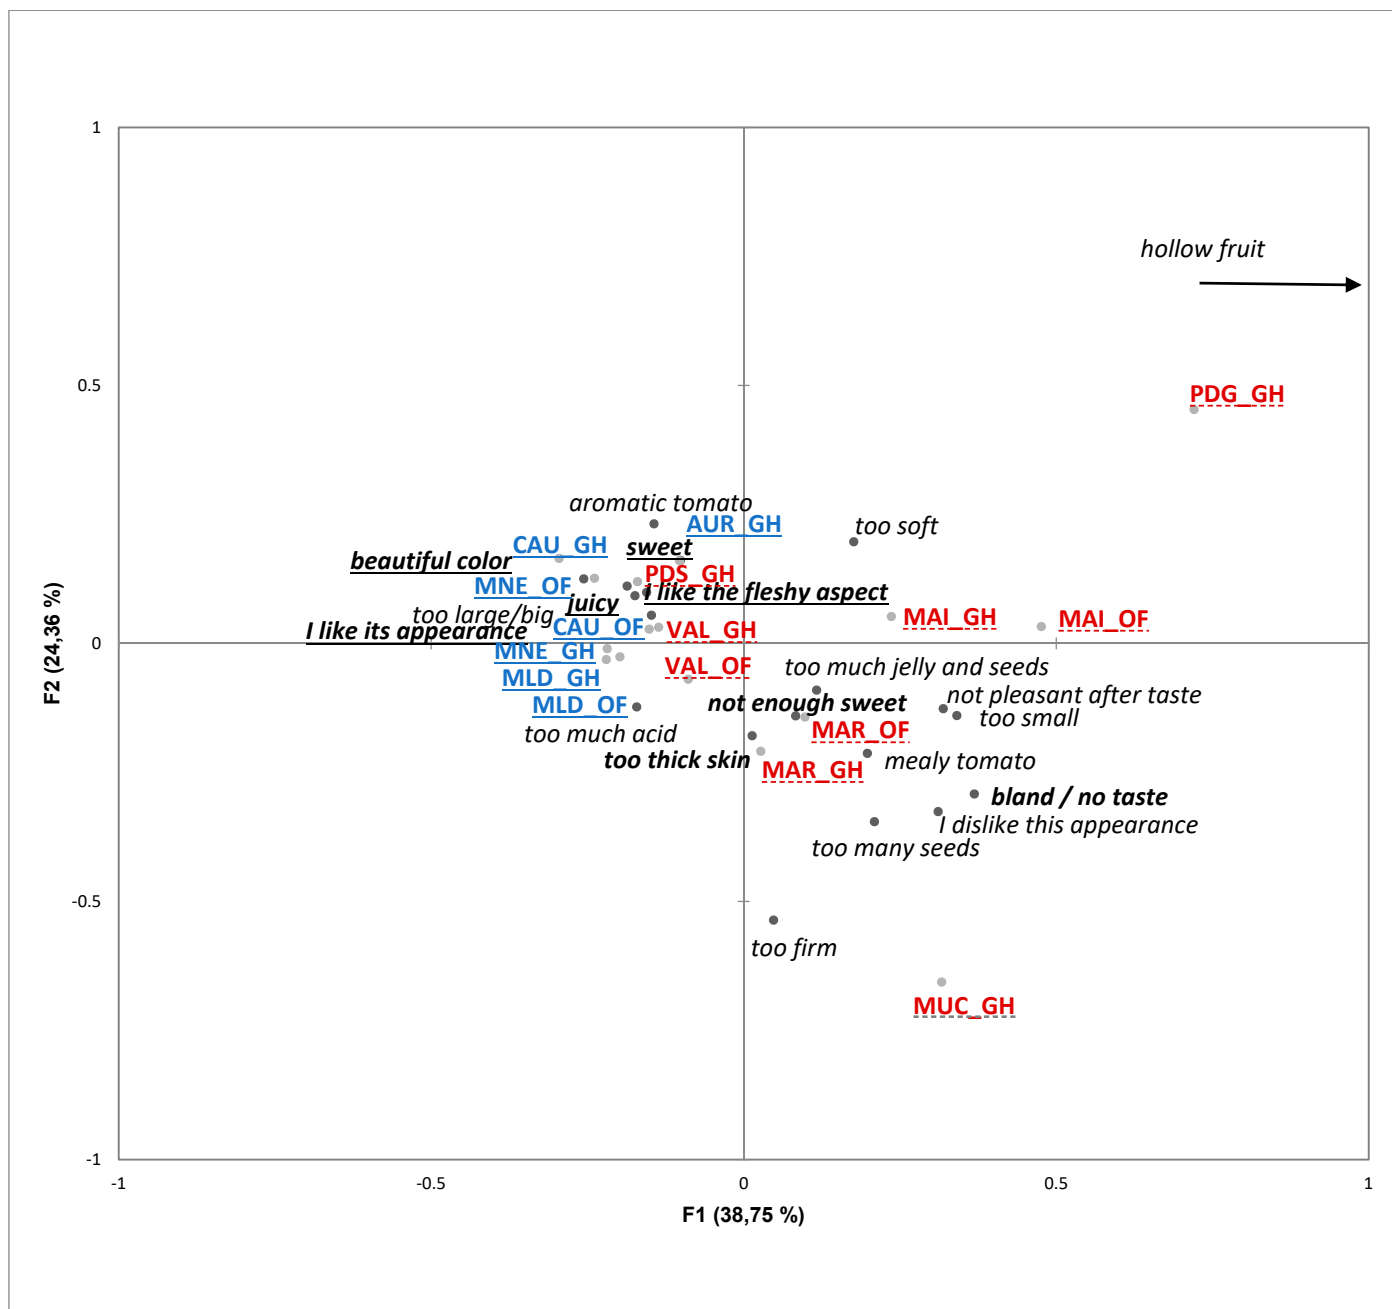

**Figure S3. Bi-plot resulting from Correspondence analysis performed on frequency table of consumers' responses to CATA questions for tomatoes harvested at the red ripe stage in Spain.**

The items that have significant positive association with overall liking from a penalty-lift analysis are reported in bold italics and underlined; negative associations are reported in bold italics. Modern varieties are in blue, underlined with solid lines; Traditional varieties are in red, underlined with dashed lines. GH=greenhouse; OF=open field.

Aurea (AUR), Cauralina (CAU), Maillane (MAI), Marmande (MAR), Marmalindo (MLD), Marbonne (MNE), Muchamiel (MUC), Pera de Girona (PDG), Pomodoro di Sorrento (PDS), Valenciana (VAL).

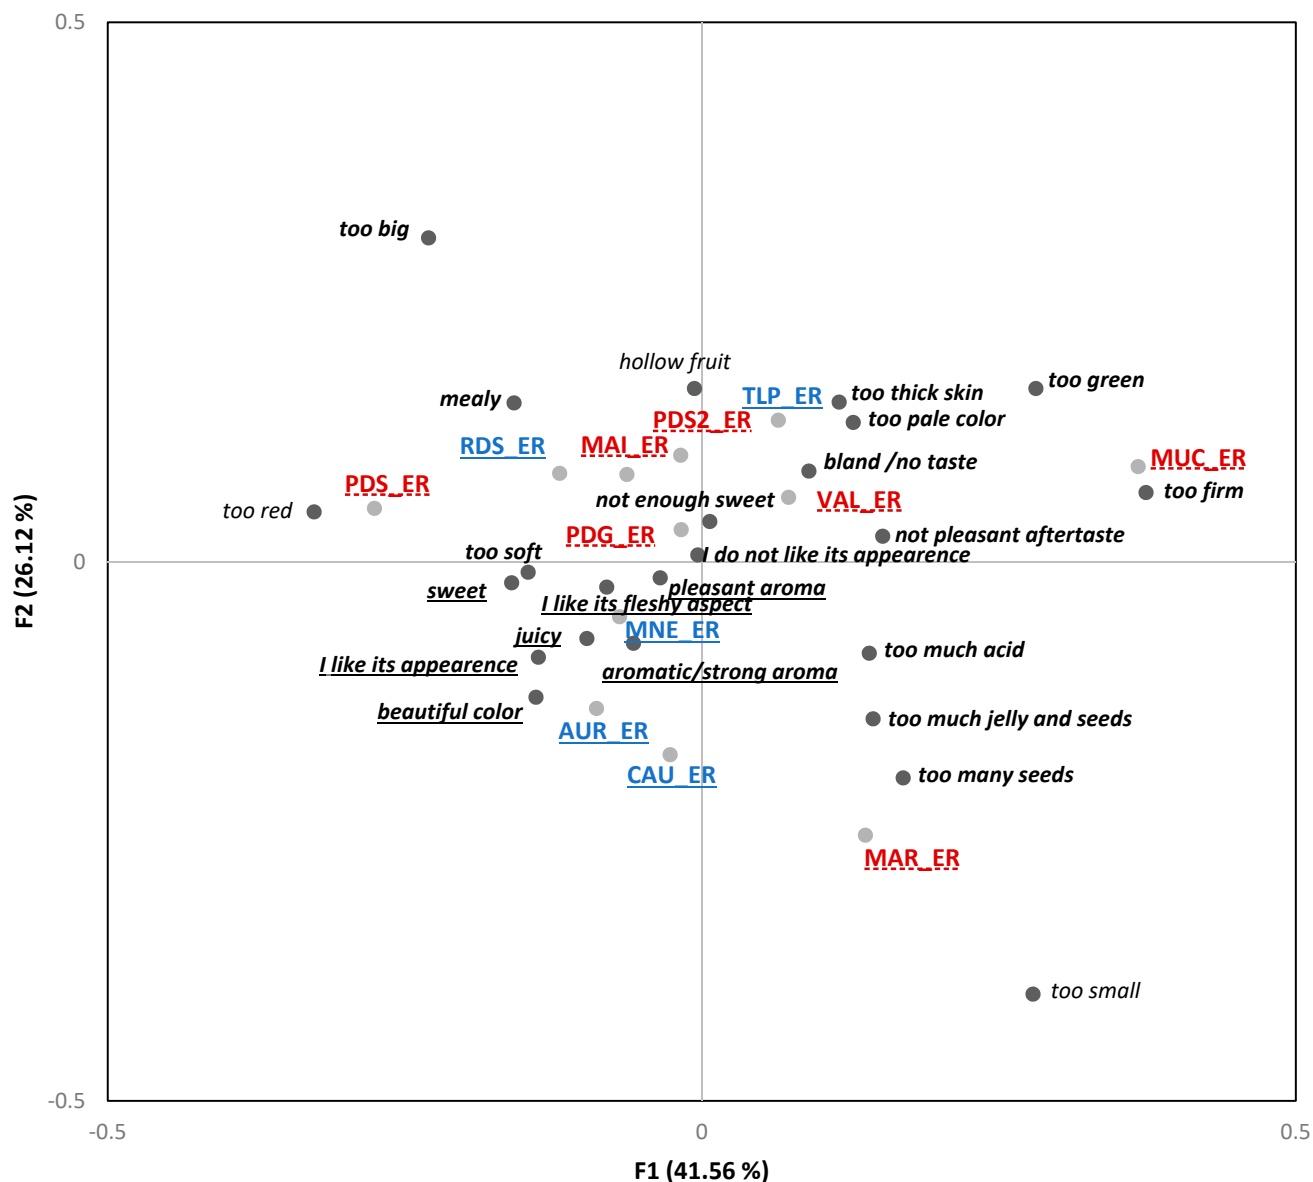

**Figure S4. Bi-plot resulting from correspondence analysis performed on frequency table of consumers' responses to CATA questions for tomatoes harvested at the early ripe stage (ER) in Italy.**

The items that have significant positive association with overall liking from a penalty-lift analysis are reported in bold italics and underlined; negative associations are reported in bold italics. Modern varieties are in blue, underlined with solid lines; Traditional varieties are in red, underlined with dashed lines.

Aurea (AUR), Cauralina (CAU), Maillane (MAI), Marmande (MAR), Marbonne (MNE), Muchamiel (MUC), Pera de Girona (PDG), Pomodoro di Sorrento (PDS), Pomodoro di Sorrento (Landrace 2) (PDS2), Rosa di Sorrento (RDS), Toi Ls Pan (TLP), Valenciana (VAL).

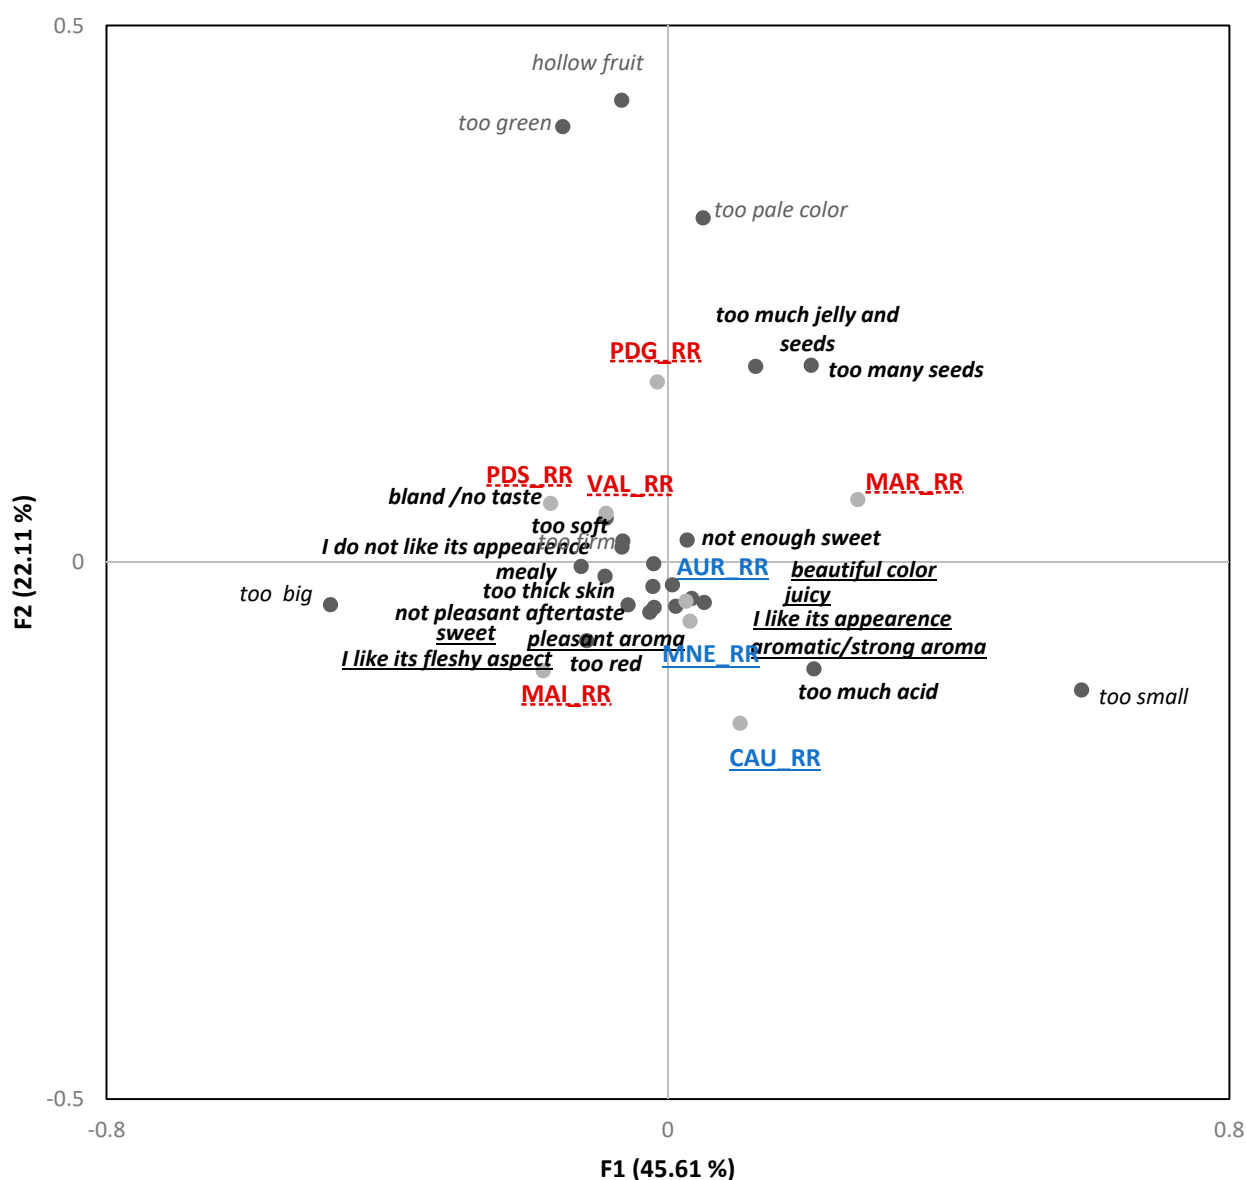

**Figure S5. Bi-plot resulting from correspondence analysis performed on frequency table of consumers' responses to CATA questions for tomatoes harvested at red ripe (RR) stage in Italy.**

The items that have significant positive association with overall liking from a penalty-lift analysis are reported in bold italics and underlined. Negative associations are reported in bold italics. Modern varieties are in blue, underlined with solid lines; Traditional varieties are in red, underlined with dashed lines.

Aurea (AUR), Cauralina (CAU), Maillane (MAI), Marmande (MAR), Marbonne (MNE), Muchamiel (MUC), Pera de Girona (PDG), Pomodoro di Sorrento (PDS), Pomodoro di Sorrento (Landrace 2) (PDS2), Rosa di Sorrento (RDS), Toi Ls Pan (TLP), Valenciana (VAL).

**Table S1. Analysis of variance and means of sensory descriptors for varietal group (Modern/Traditional), growing conditions (Soil/Soilless) and genotypes of tomato samples harvested at the red ripe stage in France (scale from 0 to 10, discontinuous; values are averages of two replicates).**

| Sensory descriptor  | Varietal group (V) |                  |                  | Growing Condition (GC) |                  |                  | (V)*(GC) | Genotype (G) | (G)*(GC) | Oxheart (Liguria)  |                    | Oxheart            |                    |                    |                    | Marmande           |                    | Round               |                    |                    |                    |
|---------------------|--------------------|------------------|------------------|------------------------|------------------|------------------|----------|--------------|----------|--------------------|--------------------|--------------------|--------------------|--------------------|--------------------|--------------------|--------------------|---------------------|--------------------|--------------------|--------------------|
|                     | (1)                | M                | T                | (1)                    | S                | HS               | (1)      | (1)          | (1)      | AUR                | PDG                | CAU                | MAI                | PDS                | VAL                | MNE                | MAR                | CLI                 | GAR                | HYB                | STP                |
| Color intensity     | 89.89***           | 6.3 <sup>a</sup> | 4.5 <sup>b</sup> | 2.07                   | 5.5              | 5.3              | 0.64     | 60.87***     | 2.18*    | 5.9 <sup>bc</sup>  | 5.4 <sup>cd</sup>  | 5.9 <sup>bc</sup>  | 5.3 <sup>cd</sup>  | 0.1 <sup>e</sup>   | 4.4 <sup>d</sup>   | 5.9 <sup>bc</sup>  | 5.9 <sup>bc</sup>  | 6.0 <sup>bc</sup>   | 6.9 <sup>ab</sup>  | 7.4 <sup>a</sup>   | 6.1 <sup>bc</sup>  |
| Size                | 9.58**             | 6.3 <sup>b</sup> | 6.8 <sup>a</sup> | 4.58*                  | 6.4 <sup>b</sup> | 6.7 <sup>a</sup> | 0.23     | 39.23***     | 1.95*    | 7.3 <sup>a</sup>   | 7.5 <sup>a</sup>   | 7.5 <sup>a</sup>   | 6.2 <sup>b</sup>   | 7.7 <sup>a</sup>   | 7.5 <sup>a</sup>   | 8.1 <sup>a</sup>   | 5.5 <sup>bc</sup>  | 4.7 <sup>cd</sup>   | 4.5 <sup>d</sup>   | 5.7 <sup>b</sup>   | 6.1 <sup>b</sup>   |
| Rib aspect          | 0.63               | 3.7              | 3.5              | 1.43                   | 3.5              | 3.7              | 1.32     | 58.60***     | 0.82     | 7.1 <sup>a</sup>   | 5.6 <sup>b</sup>   | 4.1 <sup>c</sup>   | 3.3 <sup>cde</sup> | 2.6 <sup>de</sup>  | 3.7 <sup>cd</sup>  | 5.8 <sup>b</sup>   | 3.6 <sup>cd</sup>  | 0.9 <sup>g</sup>    | 1.4 <sup>fg</sup>  | 2.6 <sup>de</sup>  | 2.2 <sup>ef</sup>  |
| Firmness to the cut | 108.83***          | 6.1 <sup>a</sup> | 4.6 <sup>b</sup> | 19.53***               | 5.1 <sup>b</sup> | 5.7 <sup>a</sup> | 0.97     | 21.17***     | 2.79**   | 5.3 <sup>cd</sup>  | 4.7 <sup>de</sup>  | 6.0 <sup>bc</sup>  | 4.0 <sup>e</sup>   | 4.6 <sup>de</sup>  | 5.4 <sup>cd</sup>  | 5.3 <sup>cd</sup>  | 5.3 <sup>cd</sup>  | 7.3 <sup>a</sup>    | 6.6 <sup>ab</sup>  | 6.3 <sup>abc</sup> | 3.7 <sup>e</sup>   |
| Overall odor        | 7.20**             | 4.9 <sup>a</sup> | 4.5 <sup>b</sup> | 8.51**                 | 4.9 <sup>a</sup> | 4.5 <sup>b</sup> | 0.97     | 4.60***      | 0.76     | 4.3 <sup>bc</sup>  | 4.4 <sup>abc</sup> | 5.0 <sup>ab</sup>  | 5.1 <sup>ab</sup>  | 4.4 <sup>abc</sup> | 3.7 <sup>c</sup>   | 5.1 <sup>ab</sup>  | 4.2 <sup>bc</sup>  | 4.2 <sup>bc</sup>   | 5.3 <sup>ab</sup>  | 5.6 <sup>a</sup>   | 5.2 <sup>ab</sup>  |
| Crunchiness         | 84.45***           | 4.5 <sup>a</sup> | 3.0 <sup>b</sup> | 4.20*                  | 3.6 <sup>b</sup> | 3.9 <sup>a</sup> | 3.74     | 26.23***     | 5.10***  | 3.1 <sup>def</sup> | 3.0 <sup>ef</sup>  | 4.2 <sup>bcd</sup> | 3.2 <sup>def</sup> | 3.0 <sup>ef</sup>  | 2.5 <sup>f</sup>   | 3.3 <sup>def</sup> | 3.8 <sup>cde</sup> | 6.7 <sup>a</sup>    | 4.9 <sup>b</sup>   | 4.8 <sup>bc</sup>  | 2.5 <sup>f</sup>   |
| Juiciness           | 7.36**             | 6.2 <sup>a</sup> | 5.7 <sup>b</sup> | 25.33***               | 6.3 <sup>a</sup> | 5.5 <sup>b</sup> | 4.32*    | 8.61***      | 3.19***  | 5.6 <sup>cd</sup>  | 5.2 <sup>cd</sup>  | 6.8 <sup>ab</sup>  | 5.2 <sup>cd</sup>  | 4.5 <sup>d</sup>   | 6.0 <sup>abc</sup> | 7.2 <sup>a</sup>   | 6.1 <sup>abc</sup> | 5.8 <sup>bcd</sup>  | 5.4 <sup>cd</sup>  | 6.0 <sup>abc</sup> | 6.8 <sup>ab</sup>  |
| Firmness            | 64.84***           | 4.2 <sup>a</sup> | 3.0 <sup>b</sup> | 5.65*                  | 3.5 <sup>b</sup> | 3.8 <sup>a</sup> | 3.33     | 21.61***     | 3.92***  | 3.2 <sup>cde</sup> | 3.1 <sup>de</sup>  | 4.0 <sup>bcd</sup> | 3.0 <sup>de</sup>  | 3.2 <sup>cde</sup> | 2.5 <sup>e</sup>   | 3.0 <sup>de</sup>  | 3.5 <sup>b-e</sup> | 6.5 <sup>a</sup>    | 4.5 <sup>b</sup>   | 4.2 <sup>bc</sup>  | 2.6 <sup>e</sup>   |
| Meltness            | 40.72***           | 5.3 <sup>b</sup> | 6.4 <sup>a</sup> | 9.34**                 | 6.1 <sup>a</sup> | 5.6 <sup>b</sup> | 6.32*    | 17.50***     | 3.53***  | 6.5 <sup>a</sup>   | 5.9 <sup>abc</sup> | 5.8 <sup>ab</sup>  | 6.3 <sup>abc</sup> | 6.3 <sup>ab</sup>  | 6.9 <sup>a</sup>   | 6.6 <sup>a</sup>   | 6.2 <sup>abc</sup> | 2.7 <sup>d</sup>    | 5.0 <sup>c</sup>   | 5.1 <sup>bc</sup>  | 7.0 <sup>a</sup>   |
| Mealiness           | 22.56***           | 2.0 <sup>b</sup> | 2.9 <sup>a</sup> | 66.92***               | 1.7 <sup>b</sup> | 3.2 <sup>a</sup> | 5.80*    | 7.82***      | 2.51**   | 3.0 <sup>bcd</sup> | 3.2 <sup>abc</sup> | 1.6 <sup>e</sup>   | 3.3 <sup>ab</sup>  | 4.3 <sup>a</sup>   | 3.0 <sup>a-e</sup> | 1.8 <sup>cde</sup> | 1.7 <sup>de</sup>  | 1.7 <sup>cde</sup>  | 2.2 <sup>b-e</sup> | 1.9 <sup>b-e</sup> | 2.1 <sup>b-e</sup> |
| Skin thickness      | 19.59***           | 4.8 <sup>a</sup> | 4.0 <sup>b</sup> | 1.86                   | 4.6              | 4.3              | 0.02     | 5.44***      | 0.32     | 4.1 <sup>bc</sup>  | 3.9 <sup>bc</sup>  | 3.8 <sup>c</sup>   | 3.9 <sup>bc</sup>  | 3.7 <sup>c</sup>   | 4.1 <sup>bc</sup>  | 4.8 <sup>abc</sup> | 4.2 <sup>bc</sup>  | 4.7 <sup>bc</sup>   | 6.3 <sup>a</sup>   | 5.4 <sup>ab</sup>  | 4.0 <sup>bc</sup>  |
| Acid taste          | 15.20***           | 4.8 <sup>a</sup> | 4.1 <sup>b</sup> | 24.12***               | 4.9 <sup>a</sup> | 4.0 <sup>b</sup> | 3.27     | 6.24***      | 3.89***  | 3.5 <sup>cd</sup>  | 3.2 <sup>d</sup>   | 5.1 <sup>ab</sup>  | 4.1 <sup>bcd</sup> | 3.7 <sup>cd</sup>  | 4.8 <sup>abc</sup> | 5.3 <sup>ab</sup>  | 4.7 <sup>abc</sup> | 5.7 <sup>a</sup>    | 4.7 <sup>abc</sup> | 4.6 <sup>abc</sup> | 3.9 <sup>bcd</sup> |
| Sweet taste         | 3.51               | 3.6              | 3.3              | 1.46                   | 3.5              | 3.3              | 0.50     | 3.19***      | 2.40**   | 3.5 <sup>ab</sup>  | 3.3 <sup>ab</sup>  | 3.6 <sup>ab</sup>  | 3.0 <sup>ab</sup>  | 3.3 <sup>ab</sup>  | 2.6 <sup>b</sup>   | 3.7 <sup>ab</sup>  | 3.3 <sup>ab</sup>  | 2.8 <sup>b</sup>    | 4.0 <sup>a</sup>   | 4.0 <sup>a</sup>   | 4.1 <sup>a</sup>   |
| Overall flavor      | 31.2***            | 5.0 <sup>a</sup> | 4.2 <sup>b</sup> | 16.03***               | 4.9 <sup>a</sup> | 4.4 <sup>b</sup> | 2.30     | 5.67***      | 1.55     | 4.4 <sup>bcd</sup> | 4.1 <sup>cd</sup>  | 5.3 <sup>ab</sup>  | 4.1 <sup>cd</sup>  | 4.1 <sup>cd</sup>  | 3.7 <sup>d</sup>   | 5.1 <sup>abc</sup> | 4.6 <sup>a-d</sup> | 4.7 <sup>abcd</sup> | 5.2 <sup>abc</sup> | 5.5 <sup>a</sup>   | 4.7 <sup>a-d</sup> |
| Tomato flavor       | 20.15***           | 4.3 <sup>a</sup> | 3.5 <sup>b</sup> | 6.30*                  | 4.1 <sup>a</sup> | 3.6 <sup>b</sup> | 0.36     | 3.53***      | 1.25     | 3.9 <sup>abc</sup> | 3.4 <sup>bc</sup>  | 4.3 <sup>abc</sup> | 3.4 <sup>bc</sup>  | 3.1 <sup>bc</sup>  | 2.9 <sup>c</sup>   | 4.4 <sup>ab</sup>  | 4.2 <sup>abc</sup> | 3.8 <sup>abc</sup>  | 4.3 <sup>abc</sup> | 5.0 <sup>a</sup>   | 3.9 <sup>abc</sup> |

Aurea (AUR), Cauralina (CAU), Climberley (CLI), Garance (GAR), Hybrid Inra (HYB), Maillane (MAI), Marbonne (MNE), Marmande (MAR), Pera de Girona (PDG), Pomodoro di Sorrento (PDS), St. Pierre (STP), Valenciana (VAL).

Traditional varieties are in grey.

M= Modern varieties; T=Traditional varieties; S= soil; HS=soilless.

(1) F value; \*p ≤ 0.05; \*\*p ≤ 0.01; \*\*\*p ≤ 0.001

Within each testing condition, means with common superscript letters are not significantly different (p ≤ 0.05) according to the Tukey's (HSD) *post hoc* test. When a mean is followed by four or more letters, the range of letters is indicated.

**Table S2. Analysis of variance and means of physicochemical parameters for varietal group (Modern/Traditional), growing condition (Soil/Soilless) and genotypes of tomato samples harvested at the red ripe stage in France (values are averages of three replicates).**

| Physicochemical<br>parameter | Varietal group<br>(V) |                   |                   | Growing Condition<br>(GC) |                   |                   | (V)*(GC) | Genotype<br>(G) | (G)*(GC) | Oxheart<br>(Liguria) |                     | Oxheart             |                     |                     |                     | Marmande            |                     | Round               |                     |                     |                     |
|------------------------------|-----------------------|-------------------|-------------------|---------------------------|-------------------|-------------------|----------|-----------------|----------|----------------------|---------------------|---------------------|---------------------|---------------------|---------------------|---------------------|---------------------|---------------------|---------------------|---------------------|---------------------|
|                              | (1)                   | M                 | T                 | (1)                       | S                 | HS                | (1)      | (1)             | (1)      | AUR                  | PDG                 | CAU                 | MAI                 | PDS                 | VAL                 | MNE                 | MAR                 | CLI                 | GAR                 | HYB                 | STP                 |
|                              |                       |                   |                   |                           |                   |                   |          |                 |          |                      |                     |                     |                     |                     |                     |                     |                     |                     |                     |                     |                     |
| FW (g)                       | 4.12*                 | 214 <sup>b</sup>  | 241 <sup>a</sup>  | 0.64                      | 224               | 230               | 0.14     | 42.00***        | 4.64***  | 268 <sup>a</sup>     | 260 <sup>a</sup>    | 286 <sup>a</sup>    | 172 <sup>bc</sup>   | 303 <sup>a</sup>    | 309 <sup>a</sup>    | 312 <sup>a</sup>    | 201 <sup>b</sup>    | 134 <sup>cd</sup>   | 119 <sup>d</sup>    | 164 <sup>bcd</sup>  | 198 <sup>b</sup>    |
| EC_L*                        | 0.99                  | 40.8              | 39.5              | 7.30**                    | 41.7 <sup>a</sup> | 38.5 <sup>b</sup> | 4.52*    | 2.72**          | 3.72***  | 43.8 <sup>ab</sup>   | 34.9 <sup>bc</sup>  | 40.2 <sup>abc</sup> | 41.9 <sup>abc</sup> | 45.4 <sup>a</sup>   | 33.4 <sup>c</sup>   | 41.2 <sup>abc</sup> | 40.6 <sup>abc</sup> | 40.1 <sup>abc</sup> | 40.3 <sup>abc</sup> | 39.6 <sup>abc</sup> | 40.1 <sup>abc</sup> |
| EC_a*                        | 0.37                  | 23.3              | 23.1              | 160.5***                  | 24.5 <sup>a</sup> | 21.8 <sup>b</sup> | <0.01    | 22.91***        | 5.30***  | 22.8 <sup>bcd</sup>  | 22.5 <sup>cd</sup>  | 22.7 <sup>cd</sup>  | 24.5 <sup>ab</sup>  | 25.0 <sup>a</sup>   | 21.6 <sup>d</sup>   | 24.1 <sup>abc</sup> | 21.8 <sup>d</sup>   | 19.7 <sup>e</sup>   | 24.8 <sup>a</sup>   | 25.8 <sup>a</sup>   | 22.7 <sup>cd</sup>  |
| EC_b*                        | 4.87*                 | 25.0 <sup>b</sup> | 26.1 <sup>a</sup> | 173.30***                 | 27.1 <sup>a</sup> | 23.9 <sup>b</sup> | 1.03     | 42.83***        | 5.59***  | 24.8 <sup>d</sup>    | 27.4 <sup>bc</sup>  | 26.0 <sup>cd</sup>  | 29.3 <sup>a</sup>   | 20.3 <sup>f</sup>   | 28.8 <sup>ab</sup>  | 27.9 <sup>ab</sup>  | 25.8 <sup>cd</sup>  | 22.2 <sup>ef</sup>  | 24.6 <sup>d</sup>   | 24.5 <sup>d</sup>   | 24.2 <sup>de</sup>  |
| FIRM (D.I.)                  | 29.48***              | 61.3 <sup>a</sup> | 52.8 <sup>b</sup> | 19.95***                  | 54.2 <sup>b</sup> | 59.5 <sup>a</sup> | 1.53     | 13.13***        | 3.69***  | 54.8 <sup>bcd</sup>  | 47.4 <sup>d</sup>   | 54.2 <sup>bcd</sup> | 51.6 <sup>bcd</sup> | 57.5 <sup>c</sup>   | 53.8 <sup>bcd</sup> | 59.2 <sup>b</sup>   | 55.4 <sup>bcd</sup> | 70.8 <sup>a</sup>   | 70.9 <sup>a</sup>   | 57.8 <sup>bc</sup>  | 48.3 <sup>cd</sup>  |
| SSC (°Bx)                    | 26.26***              | 5.37 <sup>a</sup> | 4.93 <sup>b</sup> | 190.80***                 | 5.42 <sup>a</sup> | 4.91 <sup>b</sup> | 0.48     | 66.11***        | 2.89*    | 4.79 <sup>fg</sup>   | 4.87 <sup>ef</sup>  | 5.18 <sup>cd</sup>  | 4.98 <sup>def</sup> | 5.14 <sup>cde</sup> | 4.56 <sup>g</sup>   | 4.86 <sup>ef</sup>  | 4.86 <sup>ef</sup>  | 5.21 <sup>cd</sup>  | 6.48 <sup>a</sup>   | 5.68 <sup>b</sup>   | 5.35 <sup>bc</sup>  |
| TA (g CA/100g)               | 14.88***              | 0.48 <sup>a</sup> | 0.42 <sup>b</sup> | 80.38***                  | 0.51 <sup>a</sup> | 0.40 <sup>b</sup> | 6.02*    | 7.59***         | 4.83***  | 0.36 <sup>e</sup>    | 0.40 <sup>cde</sup> | 0.50 <sup>abc</sup> | 0.41 <sup>cde</sup> | 0.38 <sup>de</sup>  | 0.47 <sup>a-d</sup> | 0.47 <sup>a-d</sup> | 0.46 <sup>a-d</sup> | 0.52 <sup>ab</sup>  | 0.55 <sup>a</sup>   | 0.50 <sup>abc</sup> | 0.41 <sup>b-e</sup> |
| Sucrose (g/kg)               | 0.17                  | 0.38              | 0.39              | 4.72*                     | 0.40 <sup>a</sup> | 0.37 <sup>b</sup> | 5.40*    | 3.51***         | 4.06***  | 0.39 <sup>abc</sup>  | 0.41 <sup>ab</sup>  | 0.38 <sup>abc</sup> | 0.41 <sup>ab</sup>  | 0.36 <sup>abc</sup> | 0.34 <sup>bc</sup>  | 0.38 <sup>abc</sup> | 0.42 <sup>ab</sup>  | 0.33 <sup>c</sup>   | 0.43 <sup>a</sup>   | 0.40 <sup>abc</sup> | 0.39 <sup>abc</sup> |
| Glucose (g/kg)               | 11.23**               | 16.2 <sup>a</sup> | 14.9 <sup>b</sup> | 37.80***                  | 16.3 <sup>a</sup> | 15.0 <sup>b</sup> | 1.32     | 30.76***        | 5.21***  | 14.4 <sup>de</sup>   | 14.7 <sup>cde</sup> | 16.1 <sup>bc</sup>  | 15.5 <sup>bcd</sup> | 16.6 <sup>b</sup>   | 13.1 <sup>e</sup>   | 13.8 <sup>e</sup>   | 13.4 <sup>e</sup>   | 16.0 <sup>bcd</sup> | 20.3 <sup>a</sup>   | 16.6 <sup>b</sup>   | 16.9 <sup>b</sup>   |
| Fructose (g/kg)              | 9.90**                | 18.4 <sup>a</sup> | 17.4 <sup>b</sup> | 44.79***                  | 18.6 <sup>a</sup> | 17.3 <sup>b</sup> | 1.74     | 22.35***        | 5.67***  | 17.0 <sup>cd</sup>   | 17.7 <sup>bcd</sup> | 18.5 <sup>b</sup>   | 16.9 <sup>cd</sup>  | 18.3 <sup>bc</sup>  | 15.3 <sup>e</sup>   | 16.7 <sup>de</sup>  | 17.8 <sup>bcd</sup> | 18.0 <sup>bcd</sup> | 21.5 <sup>a</sup>   | 18.6 <sup>b</sup>   | 18.8 <sup>b</sup>   |
| Citric acid (g/kg)           | 40.06***              | 5.6 <sup>a</sup>  | 4.8 <sup>b</sup>  | 387.66***                 | 5.9 <sup>a</sup>  | 4.5 <sup>b</sup>  | 12.47*** | 37.60***        | 22.04*** | 4.6 <sup>d</sup>     | 3.8 <sup>e</sup>    | 6.1 <sup>a</sup>    | 5.1 <sup>cd</sup>   | 4.9 <sup>d</sup>    | 5.7 <sup>ab</sup>   | 5.5 <sup>bc</sup>   | 4.6 <sup>d</sup>    | 5.7 <sup>ab</sup>   | 5.9 <sup>ab</sup>   | 5.9 <sup>ab</sup>   | 4.6 <sup>d</sup>    |
| Malic acid (g/kg)            | 21.67***              | 0.49 <sup>b</sup> | 0.66 <sup>a</sup> | 38.51***                  | 0.63 <sup>a</sup> | 0.53 <sup>b</sup> | 0.17     | 47.93***        | 9.24***  | 0.38 <sup>d</sup>    | 0.92 <sup>a</sup>   | 0.48 <sup>cd</sup>  | 0.38 <sup>d</sup>   | 0.45 <sup>cd</sup>  | 0.50 <sup>cd</sup>  | 0.45 <sup>cd</sup>  | 0.94 <sup>a</sup>   | 0.65 <sup>b</sup>   | 0.53 <sup>bc</sup>  | 0.46 <sup>cd</sup>  | 0.81 <sup>a</sup>   |

Aurea (AUR), Cauralina (CAU), Climberley (CLI), Garance (GAR), Hybrid Inra (HYB), Maillane (MAI), Marbonne (MNE), Marmande (MAR), Pera de Girona (PDG), Pomodoro di Sorrento (PDS), St. Pierre (STP), Valenciana (VAL).

Traditional varieties are in grey.

FW= fruit weight, EC =external color, SSC= soluble solids content, TA= titratable acidity, FIRM = firmness (Durofel); °Bx = degrees Brix; D.I. = Durofel Index.

M= Modern varieties; T=Traditional varieties; S= soil; HS=soilless.

<sup>(1)</sup> F value; \*p ≤ 0.05; \*\*p ≤ 0.01; \*\*\*p ≤ 0.001

Within each testing condition, means with common superscript letters are not significantly different (p ≤ 0.05) according to the Tukey’s (HSD) *post hoc* test. When a mean is followed by four or more letters, the range of letters is indicated.



**Table S3. Contingency table of the frequencies of mentions by French consumers (n=100 eligible consumers) across all 14 tomato samples, evaluated at the red ripe stage, for individual terms of the Check-All-That-Apply (CATA) questions.**

| CATA Term                        | Oxheart           |                   |                   |                   |                   | Marmande          |                   |                   |                   | Round             |                    |                   |                   |                   |
|----------------------------------|-------------------|-------------------|-------------------|-------------------|-------------------|-------------------|-------------------|-------------------|-------------------|-------------------|--------------------|-------------------|-------------------|-------------------|
|                                  | CAU_HS            | CAU_S             | MAI_HS            | MAI_S             | VAL_S             | MNE_HS            | MNE_S             | MAR_HS            | MAR_S             | CLI_HS            | GAR_HS             | GAR_S             | STP_HS            | STP_S             |
| Beautiful color ***              | 58 <sup>bcd</sup> | 45 <sup>ab</sup>  | 52 <sup>bc</sup>  | 50 <sup>bc</sup>  | 51 <sup>bc</sup>  | 45 <sup>ab</sup>  | 54 <sup>bc</sup>  | 35 <sup>a</sup>   | 49 <sup>bc</sup>  | 69 <sup>de</sup>  | 68 <sup>de</sup>   | 76 <sup>e</sup>   | 73 <sup>e</sup>   | 60 <sup>cd</sup>  |
| I like its appearance ***        | 51 <sup>bcd</sup> | 48 <sup>bc</sup>  | 33 <sup>a</sup>   | 50 <sup>bcd</sup> | 33 <sup>a</sup>   | 40 <sup>ab</sup>  | 40 <sup>ab</sup>  | 44 <sup>ab</sup>  | 52 <sup>bcd</sup> | 63 <sup>d</sup>   | 62 <sup>cd</sup>   | 62 <sup>cd</sup>  | 61 <sup>cd</sup>  | 58 <sup>cd</sup>  |
| Too big ***                      | 38 <sup>fgh</sup> | 27 <sup>def</sup> | 24 <sup>de</sup>  | 6 <sup>bc</sup>   | 34 <sup>efg</sup> | 40 <sup>gh</sup>  | 47 <sup>h</sup>   | 10 <sup>c</sup>   | 5 <sup>abc</sup>  | 1 <sup>ab</sup>   | 1 <sup>ab</sup>    | 11 <sup>c</sup>   | 0 <sup>a</sup>    | 20 <sup>d</sup>   |
| I like its fleshy aspect ***     | 44 <sup>e-h</sup> | 46 <sup>fgh</sup> | 21 <sup>a</sup>   | 28 <sup>abc</sup> | 42 <sup>e-h</sup> | 54 <sup>h</sup>   | 50 <sup>gh</sup>  | 30 <sup>a-d</sup> | 38 <sup>a-e</sup> | 23 <sup>ab</sup>  | 23 <sup>ab</sup>   | 34 <sup>b-f</sup> | 26 <sup>abc</sup> | 39 <sup>d-g</sup> |
| I do not like its appearance *** | 22 <sup>bc</sup>  | 26 <sup>c</sup>   | 29 <sup>c</sup>   | 22 <sup>bc</sup>  | 27 <sup>c</sup>   | 21 <sup>bc</sup>  | 24 <sup>c</sup>   | 25 <sup>c</sup>   | 19 <sup>abc</sup> | 9 <sup>a</sup>    | 9 <sup>a</sup>     | 10 <sup>a</sup>   | 9 <sup>a</sup>    | 13 <sup>ab</sup>  |
| Hollow fruit ***                 | 2 <sup>a</sup>    | 3 <sup>a</sup>    | 61 <sup>d</sup>   | 27 <sup>c</sup>   | 5 <sup>ab</sup>   | 4 <sup>a</sup>    | 3 <sup>a</sup>    | 12 <sup>b</sup>   | 2 <sup>a</sup>    | 3 <sup>a</sup>    | 3 <sup>a</sup>     | 1 <sup>a</sup>    | 4 <sup>ab</sup>   | 3 <sup>a</sup>    |
| Too small ***                    | 1 <sup>a</sup>    | 3 <sup>ab</sup>   | 3 <sup>ab</sup>   | 4 <sup>ab</sup>   | 1 <sup>ab</sup>   | 0 <sup>a</sup>    | 0 <sup>a</sup>    | 7 <sup>b</sup>    | 5 <sup>ab</sup>   | 7 <sup>b</sup>    | 7 <sup>b</sup>     | 3 <sup>ab</sup>   | 27 <sup>c</sup>   | 0 <sup>a</sup>    |
| Too much jelly and seeds ***     | 5 <sup>a</sup>    | 3 <sup>a</sup>    | 7 <sup>ab</sup>   | 8 <sup>abc</sup>  | 8 <sup>abc</sup>  | 9 <sup>a-d</sup>  | 10 <sup>a-d</sup> | 15 <sup>bcd</sup> | 8 <sup>abc</sup>  | 18 <sup>d</sup>   | 18 <sup>d</sup>    | 9 <sup>abcd</sup> | 4 <sup>a</sup>    | 17 <sup>cd</sup>  |
| Juicy ***                        | 53 <sup>de</sup>  | 62 <sup>ef</sup>  | 21 <sup>a</sup>   | 36 <sup>bc</sup>  | 47 <sup>cd</sup>  | 68 <sup>f</sup>   | 68 <sup>f</sup>   | 50 <sup>cde</sup> | 64 <sup>ef</sup>  | 42 <sup>cd</sup>  | 44 <sup>cd</sup>   | 28 <sup>ab</sup>  | 64 <sup>ef</sup>  | 68 <sup>f</sup>   |
| Too thick skin ***               | 28 <sup>b-e</sup> | 29 <sup>b-f</sup> | 30 <sup>b-f</sup> | 34 <sup>c-f</sup> | 27 <sup>bcd</sup> | 24 <sup>abc</sup> | 21 <sup>ab</sup>  | 37 <sup>def</sup> | 35 <sup>c-f</sup> | 40 <sup>ef</sup>  | 41 <sup>fg</sup>   | 53 <sup>g</sup>   | 15 <sup>a</sup>   | 19 <sup>ab</sup>  |
| Too firm ***                     | 11 <sup>b-e</sup> | 16 <sup>cde</sup> | 8 <sup>bcd</sup>  | 9 <sup>b-e</sup>  | 7 <sup>bc</sup>   | 11 <sup>b-e</sup> | 10 <sup>b-e</sup> | 19 <sup>e</sup>   | 16 <sup>de</sup>  | 46 <sup>f</sup>   | 17 <sup>de</sup>   | 59 <sup>g</sup>   | 0 <sup>a</sup>    | 3 <sup>ab</sup>   |
| Mealy ***                        | 15 <sup>bc</sup>  | 8 <sup>ab</sup>   | 26 <sup>c</sup>   | 27 <sup>c</sup>   | 28 <sup>c</sup>   | 4 <sup>a</sup>    | 7 <sup>ab</sup>   | 16 <sup>abc</sup> | 4 <sup>a</sup>    | 8 <sup>ab</sup>   | 11 <sup>ab</sup>   | 8 <sup>ab</sup>   | 15 <sup>bc</sup>  | 13 <sup>ab</sup>  |
| Too soft ***                     | 12 <sup>cde</sup> | 6 <sup>bc</sup>   | 32 <sup>f</sup>   | 18 <sup>de</sup>  | 33 <sup>f</sup>   | 7 <sup>bc</sup>   | 10 <sup>cd</sup>  | 14 <sup>cde</sup> | 21 <sup>ef</sup>  | 2 <sup>ab</sup>   | 7 <sup>bc</sup>    | 0 <sup>a</sup>    | 31 <sup>f</sup>   | 32 <sup>f</sup>   |
| Too many seeds **                | 2 <sup>a</sup>    | 5 <sup>ab</sup>   | 16 <sup>cd</sup>  | 9 <sup>a-d</sup>  | 5 <sup>ab</sup>   | 14 <sup>bcd</sup> | 15 <sup>ab</sup>  | 11 <sup>bcd</sup> | 12 <sup>bcd</sup> | 18 <sup>d</sup>   | 7 <sup>abc</sup>   | 10 <sup>bcd</sup> | 11 <sup>bcd</sup> | 12 <sup>bcd</sup> |
| Too much acid ***                | 8 <sup>ab</sup>   | 26 <sup>d</sup>   | 7 <sup>ab</sup>   | 12 <sup>ab</sup>  | 13 <sup>b</sup>   | 8 <sup>ab</sup>   | 14 <sup>b</sup>   | 8 <sup>ab</sup>   | 25 <sup>cd</sup>  | 10 <sup>ab</sup>  | 6 <sup>ab</sup>    | 28 <sup>d</sup>   | 4 <sup>a</sup>    | 15 <sup>bc</sup>  |
| Not enough sweet ***             | 40 <sup>a-e</sup> | 34 <sup>abc</sup> | 44 <sup>cde</sup> | 47 <sup>de</sup>  | 43 <sup>b-e</sup> | 34 <sup>a-d</sup> | 29 <sup>a</sup>   | 44 <sup>cde</sup> | 34 <sup>a-d</sup> | 39 <sup>a-d</sup> | 29 <sup>a</sup>    | 53 <sup>e</sup>   | 30 <sup>ab</sup>  | 32 <sup>abc</sup> |
| Bland / no taste ***             | 36 <sup>c-f</sup> | 18 <sup>a</sup>   | 56 <sup>g</sup>   | 45 <sup>fg</sup>  | 47 <sup>fg</sup>  | 28 <sup>abc</sup> | 17 <sup>a</sup>   | 46 <sup>fg</sup>  | 24 <sup>abc</sup> | 43 <sup>efc</sup> | 24 <sup>abc</sup>  | 31 <sup>b-e</sup> | 38 <sup>def</sup> | 21 <sup>ab</sup>  |
| Not pleasant after taste ***     | 11 <sup>abc</sup> | 13 <sup>abc</sup> | 17 <sup>bcd</sup> | 15 <sup>bcd</sup> | 26 <sup>d</sup>   | 10 <sup>abc</sup> | 10 <sup>abc</sup> | 13 <sup>abc</sup> | 8 <sup>ab</sup>   | 10 <sup>abc</sup> | 10 <sup>abc</sup>  | 19 <sup>cd</sup>  | 5 <sup>a</sup>    | 9 <sup>ab</sup>   |
| Pleasant aroma ***               | 43 <sup>bcd</sup> | 46 <sup>bcd</sup> | 27 <sup>a</sup>   | 33 <sup>ab</sup>  | 25 <sup>a</sup>   | 54 <sup>cde</sup> | 61 <sup>e</sup>   | 40 <sup>bc</sup>  | 48 <sup>cde</sup> | 41 <sup>bcd</sup> | 55 <sup>de</sup>   | 33 <sup>ab</sup>  | 50 <sup>cde</sup> | 54 <sup>cde</sup> |
| Aromatic / strong aroma ***      | 19 <sup>bc</sup>  | 33 <sup>ef</sup>  | 12 <sup>ab</sup>  | 19 <sup>bc</sup>  | 18 <sup>bc</sup>  | 36 <sup>f</sup>   | 33 <sup>f</sup>   | 7 <sup>a</sup>    | 21 <sup>b-e</sup> | 15 <sup>ab</sup>  | 30 <sup>cdef</sup> | 18 <sup>bc</sup>  | 20 <sup>bcd</sup> | 31 <sup>def</sup> |

Aurea (AUR), Cauralina (CAU), Climberley (CLI), Garance (GAR), Hyblnra (HYB), Maillane (MAI), Marbonne (MNE), Marmande (MAR), Pera de Girona (PDG), Pomodoro di Sorrento (PDS), St. Pierre (STP), Valenciana (VAL). S= soil; HS=soilless. Traditional varieties are in grey.

Values within a row with common letters are not significantly different ( $p \leq 0.05$ ). Multiple pairwise comparisons based on McNemar's test. When a mean is followed by four or more letters, the range of letters is indicated.

Asterisks indicate significant differences according to Cochran's Q test at \* $p \leq 0.05$ , \*\* $p \leq 0.01$ , \*\*\* $p \leq 0.001$ , while ns indicates non-significant differences between samples.

**Table S4. Analysis of variance and means of sensory descriptors for varietal group (Modern/Traditional), growing condition (Greenhouse/Open Field) and genotypes of tomato samples harvested at the red ripe stage in Spain (scale from 0 to 10, semi-structured continuous; values are averages of two replicates).**

| Sensory descriptor | Varietal group (V) |                  |                  | Growing Condition (GC) |                  |                  | (V)*(GC) | Genotype (G) | (G)*(GC) | Oxheart (Liguria)   |                    | Oxheart            |                    |                    |                    |                    |                    | Marmande           |                    |                    |  |
|--------------------|--------------------|------------------|------------------|------------------------|------------------|------------------|----------|--------------|----------|---------------------|--------------------|--------------------|--------------------|--------------------|--------------------|--------------------|--------------------|--------------------|--------------------|--------------------|--|
|                    | (1)                | M                | T                | (1)                    | GH               | OF               | (1)      | (1)          | (1)      | AUR                 | PDG                | CAU                | MAI                | VAL                | TLP                | PDS                | MNE                | MAR                | MLD                | MUC                |  |
| Overall odor       | 0.07               | 6.0              | 6.0              | 5.72*                  | 6.2 <sup>a</sup> | 5.8 <sup>b</sup> | 0.86     | 2.25*        | 1.21     | 5.6 <sup>b</sup>    | 5.9 <sup>ab</sup>  | 5.8 <sup>ab</sup>  | 6.0 <sup>ab</sup>  | 5.6 <sup>b</sup>   | 6.0 <sup>ab</sup>  | 6.9 <sup>a</sup>   | 6.4 <sup>ab</sup>  | 5.7 <sup>ab</sup>  | 6.2 <sup>ab</sup>  | 6.1 <sup>ab</sup>  |  |
| Acid taste         | 0.28               | 5.5              | 5.4              | 6.06*                  | 5.6 <sup>a</sup> | 5.2 <sup>b</sup> | 1.40     | 4.34***      | 1.64     | 4.8 <sup>b</sup>    | 4.7 <sup>b</sup>   | 6.1 <sup>a</sup>   | 5.4 <sup>ab</sup>  | 6.3 <sup>a</sup>   | 5.5 <sup>ab</sup>  | 4.8 <sup>b</sup>   | 5.6 <sup>ab</sup>  | 6.1 <sup>a</sup>   | 5.2 <sup>ab</sup>  | 4.8 <sup>b</sup>   |  |
| Sweet taste        | 8.86**             | 5.6 <sup>a</sup> | 5.0 <sup>b</sup> | 3.59                   | 5.1              | 5.5              | 2.33     | 5.77***      | 3.46***  | 5.4 <sup>a</sup>    | 5.8 <sup>a</sup>   | 5.8 <sup>a</sup>   | 5.4 <sup>a</sup>   | 5.1 <sup>ab</sup>  | 5.8 <sup>a</sup>   | 5.8 <sup>a</sup>   | 5.2 <sup>ab</sup>  | 4.1 <sup>b</sup>   | 5.6 <sup>a</sup>   | 3.9 <sup>b</sup>   |  |
| Overall flavor     | 15.80***           | 6.5 <sup>a</sup> | 5.8 <sup>b</sup> | 0.18                   | 6.1              | 6.1              | 0.45     | 4.48***      | 2.31*    | 5.9 <sup>ab</sup>   | 6.0 <sup>ab</sup>  | 6.8 <sup>a</sup>   | 6.0 <sup>ab</sup>  | 5.8 <sup>ab</sup>  | 6.7 <sup>a</sup>   | 6.5 <sup>a</sup>   | 6.6 <sup>a</sup>   | 5.6 <sup>ab</sup>  | 6.3 <sup>a</sup>   | 4.8 <sup>b</sup>   |  |
| Tomato flavor      | 11.24***           | 5.8 <sup>a</sup> | 5.2 <sup>b</sup> | 1.61                   | 5.4              | 5.7              | 0.51     | 6.55***      | 2.41**   | 5.4 <sup>abc</sup>  | 5.7 <sup>abc</sup> | 6.4 <sup>ab</sup>  | 5.4 <sup>abc</sup> | 5.1 <sup>bcd</sup> | 6.1 <sup>ab</sup>  | 6.5 <sup>a</sup>   | 5.5 <sup>abc</sup> | 4.6 <sup>cd</sup>  | 5.7 <sup>abc</sup> | 3.8 <sup>d</sup>   |  |
| Juiciness          | 0.53               | 6.4              | 6.3              | 3.81                   | 6.5              | 6.2              | 1.26     | 3.38***      | 1.5      | 6.3 <sup>abc</sup>  | 6.5 <sup>abc</sup> | 6.5 <sup>abc</sup> | 5.7 <sup>c</sup>   | 6.7 <sup>abc</sup> | 6.3 <sup>abc</sup> | 5.9 <sup>bc</sup>  | 6.9 <sup>ab</sup>  | 7.3 <sup>a</sup>   | 6.1 <sup>abc</sup> | 5.8 <sup>bc</sup>  |  |
| Firmness           | 2.33               | 5.1              | 4.8              | 7.62**                 | 5.2 <sup>a</sup> | 4.7 <sup>b</sup> | 0.07     | 3.34***      | 1.2      | 5.0 <sup>abc</sup>  | 4.8 <sup>abc</sup> | 5.3 <sup>ab</sup>  | 5.6 <sup>a</sup>   | 3.8 <sup>c</sup>   | 4.9 <sup>abc</sup> | 3.9 <sup>bc</sup>  | 4.7 <sup>bc</sup>  | 5.1 <sup>abc</sup> | 5.6 <sup>a</sup>   | 5.3 <sup>ab</sup>  |  |
| Mealiness          | 1.27               | 2.8              | 3.0              | 9.18**                 | 2.7 <sup>b</sup> | 3.2 <sup>a</sup> | 3.90*    | 4.30***      | 2.90**   | 2.7 <sup>abcd</sup> | 2.0 <sup>d</sup>   | 2.3 <sup>bcd</sup> | 2.8 <sup>a-d</sup> | 3.8 <sup>ab</sup>  | 2.4 <sup>bcd</sup> | 3.0 <sup>a-d</sup> | 2.6 <sup>bcd</sup> | 2.1 <sup>cd</sup>  | 3.7 <sup>abc</sup> | 4.4 <sup>a</sup>   |  |
| Skin thickness     | 0.77               | 6.3              | 6.5              | 3.45                   | 6.2              | 6.6              | 0.97     | 3.67***      | 0.43     | 5.3 <sup>c</sup>    | 5.6 <sup>bc</sup>  | 6.8 <sup>abc</sup> | 6.6 <sup>abc</sup> | 7.5 <sup>a</sup>   | 5.9 <sup>abc</sup> | 6.1 <sup>abc</sup> | 6.2 <sup>abc</sup> | 6.9 <sup>abc</sup> | 7.2 <sup>ab</sup>  | 6.1 <sup>abc</sup> |  |

Aurea (AUR), Cauralina (CAU), Maillane (MAI), Marmande (MAR), Marmalindo (MLD), Marbonne (MNE), Muchamiel (MUC), Pera de Girona (PDG), Pomodoro di Sorrento (PDS), Toi Ls Pan (TLP), Valenciana (VAL).

Traditional varieties are in grey.

M= Modern varieties; T=Traditional varieties; GH= greenhouse; OF=open field.

<sup>(1)</sup> F value; \*p ≤ 0.05; \*\*p ≤ 0.01; \*\*\*p ≤ 0.001

Within each testing condition, means with common superscript letters are not significantly different (p ≤ 0.05) according to the Tukey's (HSD) *post hoc* test.

**Table S5. Analysis of variance and means of physicochemical parameters for varietal group (Modern/Traditional), growing condition (Greenhouse/Open Field) and genotypes of tomato samples harvested at the red ripe stage in Spain (values are averages of a minimum of two replicates).**

| Physicochemical<br>parameter | Varietal group<br>(V) |                   |                   | Growing Condition<br>(GC) |                   |                   | (V)*(GC) | Genotype<br>(G) | (G)*(GC) | Oxheart (Liguria)   |                     | Oxheart             |                     |                     |                     |                     | Marmande            |                     |                    |                    |
|------------------------------|-----------------------|-------------------|-------------------|---------------------------|-------------------|-------------------|----------|-----------------|----------|---------------------|---------------------|---------------------|---------------------|---------------------|---------------------|---------------------|---------------------|---------------------|--------------------|--------------------|
|                              | (1)                   | M                 | T                 | (1)                       | GH                | OF                | (1)      | (1)             | (1)      | AUR                 | PDG                 | CAU                 | MAI                 | VAL                 | TLP                 | PDS                 | MNE                 | MAR                 | MLD                | MUC                |
|                              |                       |                   |                   |                           |                   |                   |          |                 |          |                     |                     |                     |                     |                     |                     |                     |                     |                     |                    |                    |
| EC_L*                        | 2.49                  | 46.2              | 47.1              | 0.27                      | 46.6              | 46.8              | 0.05     | 23.33***        | 5.34***  | 44.6 <sup>e</sup>   | 45.1 <sup>de</sup>  | 44.2 <sup>e</sup>   | 42.9 <sup>e</sup>   | 49.6 <sup>b</sup>   | 47.6 <sup>bcd</sup> | 48.1 <sup>bc</sup>  | 45.6 <sup>cde</sup> | 43.8 <sup>e</sup>   | 48.9 <sup>b</sup>  | 53.2 <sup>a</sup>  |
| EC_a*                        | 0.97                  | 30.8              | 30.3              | 0.05                      | 30.5              | 30.4              | 4.38*    | 13.90***        | 8.38***  | 33.2 <sup>a</sup>   | 30.8 <sup>ab</sup>  | 31.7 <sup>ab</sup>  | 32.1 <sup>ab</sup>  | 27.1 <sup>cd</sup>  | 29.6 <sup>bc</sup>  | 31.9 <sup>ab</sup>  | 32.6 <sup>ab</sup>  | 33.3 <sup>a</sup>   | 26.8 <sup>cd</sup> | 25.6 <sup>d</sup>  |
| EC_b*                        | 7.88**                | 31.2 <sup>b</sup> | 33.7 <sup>a</sup> | 1.44                      | 32.2              | 32.8              | 0.21     | 40.68***        | 3.27***  | 31.1 <sup>de</sup>  | 30.7 <sup>e</sup>   | 30.2 <sup>e</sup>   | 34.6 <sup>bcd</sup> | 34.9 <sup>bc</sup>  | 23.3 <sup>f</sup>   | 26.3 <sup>f</sup>   | 33.8 <sup>b-e</sup> | 32.2 <sup>cde</sup> | 37.5 <sup>b</sup>  | 43.3 <sup>a</sup>  |
| FIRM (D.I)                   | <.01                  | 64.6              | 64.7              | 80.03***                  | 61.6 <sup>b</sup> | 67.9 <sup>a</sup> | 14.85*** | 37.14***        | 8.44***  | 60.4 <sup>d</sup>   | 62.1 <sup>cd</sup>  | 62.0 <sup>cd</sup>  | 58.1 <sup>d</sup>   | 60.2 <sup>d</sup>   | 66.9 <sup>bc</sup>  | 67.2 <sup>bc</sup>  | 65.8 <sup>bc</sup>  | 57.8 <sup>d</sup>   | 69.0 <sup>b</sup>  | 82.7 <sup>a</sup>  |
| SSC (°Bx)                    | 15.20***              | 5.7 <sup>a</sup>  | 5.1 <sup>b</sup>  | 4.14*                     | 5.2 <sup>b</sup>  | 5.5 <sup>a</sup>  | 5.02*    | 3.57***         | 1.65     | 5.43 <sup>ab</sup>  | 4.85 <sup>b</sup>   | 5.94 <sup>a</sup>   | 5.73 <sup>ab</sup>  | 5.14 <sup>ab</sup>  | 5.47 <sup>ab</sup>  | 5.23 <sup>ab</sup>  | 5.95 <sup>a</sup>   | 4.80 <sup>b</sup>   | 5.55 <sup>ab</sup> | 4.65 <sup>b</sup>  |
| TA (g CA/100g)               | 10.18**               | 0.32 <sup>a</sup> | 0.26 <sup>b</sup> | 0.10                      | 0.29              | 0.29              | <0.01    | 8.00***         | 1.48     | 0.27 <sup>abc</sup> | 0.21 <sup>c</sup>   | 0.34 <sup>ab</sup>  | 0.26 <sup>bc</sup>  | 0.33 <sup>ab</sup>  | 0.27 <sup>bc</sup>  | 0.28 <sup>abc</sup> | 0.34 <sup>b</sup>   | 0.30 <sup>abc</sup> | 0.37 <sup>a</sup>  | 0.21 <sup>c</sup>  |
| pH                           | 6.26*                 | 4.3 <sup>b</sup>  | 4.4 <sup>a</sup>  | 2.25                      | 4.4               | 4.3               | 0.08     | 15.85***        | 1.70     | 4.45 <sup>a</sup>   | 4.47 <sup>a</sup>   | 4.26 <sup>bcd</sup> | 4.45 <sup>a</sup>   | 4.37 <sup>abc</sup> | 4.43 <sup>a</sup>   | 4.43 <sup>a</sup>   | 4.27 <sup>bcd</sup> | 4.24 <sup>cd</sup>  | 4.18 <sup>d</sup>  | 4.40 <sup>ab</sup> |
| DM (%)                       | 5.40*                 | 6.6 <sup>a</sup>  | 6.2 <sup>b</sup>  | 3.05                      | 6.2               | 6.4               | 0.93     | 11.45***        | 2.64*    | 6.06 <sup>cd</sup>  | 6.25 <sup>bcd</sup> | 7.11 <sup>a</sup>   | 6.50 <sup>abc</sup> | 6.53 <sup>abc</sup> | 6.34 <sup>a-d</sup> | 6.59 <sup>abc</sup> | 6.47 <sup>abc</sup> | 5.74 <sup>de</sup>  | 6.82 <sup>ab</sup> | 5.18 <sup>e</sup>  |

Aurea (AUR), Cauralina (CAU), Maillane (MAI), Marmande (MAR), Marmalindo (MLD), Marbonne (MNE), Muchamiel (MUC), Pera de Girona (PDG), Pomodoro di Sorrento (PDS), Toi Ls Pan (TLP), Valenciana (VAL).

Traditional varieties are in grey.

SSC= Soluble solids content, EC =external color, DM = Dry matter, TA= Titratable acidity, CA= Citric acid, FIRM = Firmness (Durofel); °Bx = degrees Brix; D.I. = Durofel Index.

M=Modern varieties; T=Traditional varieties; GH= greenhouse; OF=open field.

<sup>(1)</sup> F value; \*p ≤ 0.05; \*\*p ≤ 0.01; \*\*\*p ≤ 0.001

Within each testing condition, means with common superscript letters are not significantly different (p ≤ 0.05) according to the Tukey’s (HSD) *post hoc* test. When a mean is followed by four or more letters, the range of letters is indicated.

**Table S6. Contingency table of the frequencies of mentions by Spanish consumers (n= 115 eligible consumers) across all 16 tomato samples, evaluated at the red ripe stage, for individual terms of the CATA questions.**

| CATA Term                        | Oxheart (Liguria) |                   | Oxheart           |                   |                     |                   |                   |                   |                   | Marmande          |                   |                   |                   |                   |                   |                   |
|----------------------------------|-------------------|-------------------|-------------------|-------------------|---------------------|-------------------|-------------------|-------------------|-------------------|-------------------|-------------------|-------------------|-------------------|-------------------|-------------------|-------------------|
|                                  | AUR_GH            | PDG_GH            | CAU_GH            | CAU_OF            | MAI_GH              | MAI_OF            | VAL_GH            | VAL_OF            | PDS_GH            | MNE_GH            | MNE_OF            | MAR_GH            | MAR_OF            | MLD_GH            | MLD_OF            | MUC_GH            |
| Beautiful color ***              | 60 <sup>cde</sup> | 36 <sup>ab</sup>  | 64 <sup>cde</sup> | 66 <sup>cde</sup> | 45 <sup>abc</sup>   | 49 <sup>bc</sup>  | 64 <sup>cde</sup> | 61 <sup>cde</sup> | 65 <sup>cde</sup> | 73 <sup>de</sup>  | 80 <sup>e</sup>   | 47 <sup>bc</sup>  | 52 <sup>bcd</sup> | 59 <sup>b-e</sup> | 62 <sup>cde</sup> | 22 <sup>a</sup>   |
| I like its appearance ***        | 55 <sup>a-e</sup> | 41 <sup>ab</sup>  | 63 <sup>b-e</sup> | 63 <sup>b-e</sup> | 47 <sup>abc</sup>   | 45 <sup>abc</sup> | 49 <sup>a-d</sup> | 68 <sup>cde</sup> | 42 <sup>ab</sup>  | 62 <sup>b-e</sup> | 66 <sup>b-e</sup> | 48 <sup>abc</sup> | 54 <sup>a-d</sup> | 80 <sup>e</sup>   | 74 <sup>de</sup>  | 31 <sup>a</sup>   |
| Too big ***                      | 19 <sup>d</sup>   | 10 <sup>a-d</sup> | 12 <sup>a-d</sup> | 6 <sup>a-d</sup>  | 4 <sup>abc</sup>    | 1 <sup>ab</sup>   | 17 <sup>cd</sup>  | 10 <sup>a-d</sup> | 34 <sup>e</sup>   | 10 <sup>a-d</sup> | 7 <sup>a-d</sup>  | 6 <sup>a-d</sup>  | 0 <sup>a</sup>    | 7 <sup>a-d</sup>  | 3 <sup>abc</sup>  | 15 <sup>bcd</sup> |
| I like its fleshy aspect ***     | 41 <sup>b-e</sup> | 22 <sup>ab</sup>  | 60 <sup>e</sup>   | 49 <sup>de</sup>  | 32 <sup>a-bcd</sup> | 22 <sup>ab</sup>  | 47 <sup>cde</sup> | 41 <sup>b-e</sup> | 51 <sup>de</sup>  | 44 <sup>b-e</sup> | 51 <sup>de</sup>  | 37 <sup>a-e</sup> | 24 <sup>abc</sup> | 38 <sup>a-e</sup> | 42 <sup>b-e</sup> | 16 <sup>a</sup>   |
| I do not like its appearance *** | 24 <sup>bc</sup>  | 15 <sup>abc</sup> | 9 <sup>ab</sup>   | 13 <sup>ab</sup>  | 32 <sup>cd</sup>    | 23 <sup>abc</sup> | 17 <sup>abc</sup> | 14 <sup>abc</sup> | 20 <sup>abc</sup> | 14 <sup>abc</sup> | 7 <sup>ab</sup>   | 23 <sup>abc</sup> | 18 <sup>abc</sup> | 5 <sup>a</sup>    | 8 <sup>ab</sup>   | 47 <sup>d</sup>   |
| Hollow fruit ***                 | 7 <sup>a</sup>    | 58 <sup>d</sup>   | 3 <sup>a</sup>    | 3 <sup>a</sup>    | 23 <sup>b</sup>     | 38 <sup>c</sup>   | 0 <sup>a</sup>    | 1 <sup>a</sup>    | 4 <sup>a</sup>    | 1 <sup>a</sup>    | 1 <sup>a</sup>    | 1 <sup>a</sup>    | 6 <sup>a</sup>    | 1 <sup>a</sup>    | 1 <sup>a</sup>    | 1 <sup>a</sup>    |
| Too small ***                    | 3 <sup>a</sup>    | 3 <sup>a</sup>    | 3 <sup>a</sup>    | 3 <sup>a</sup>    | 6 <sup>ab</sup>     | 9 <sup>ab</sup>   | 0 <sup>a</sup>    | 1 <sup>a</sup>    | 0 <sup>a</sup>    | 3 <sup>a</sup>    | 3 <sup>a</sup>    | 6 <sup>ab</sup>   | 13 <sup>b</sup>   | 2 <sup>a</sup>    | 4 <sup>ab</sup>   | 3 <sup>a</sup>    |
| Too much jelly and seeds ***     | 6 <sup>a</sup>    | 8 <sup>ab</sup>   | 2 <sup>a</sup>    | 3 <sup>a</sup>    | 6 <sup>a</sup>      | 5 <sup>a</sup>    | 6 <sup>a</sup>    | 4 <sup>a</sup>    | 2 <sup>a</sup>    | 7 <sup>ab</sup>   | 10 <sup>ab</sup>  | 10 <sup>ab</sup>  | 18 <sup>b</sup>   | 7 <sup>ab</sup>   | 7 <sup>ab</sup>   | 6 <sup>a</sup>    |
| Juicy ***                        | 64 <sup>e</sup>   | 38 <sup>a-d</sup> | 70 <sup>e</sup>   | 48 <sup>a-e</sup> | 47 <sup>a-e</sup>   | 30 <sup>ab</sup>  | 52 <sup>b-e</sup> | 35 <sup>abc</sup> | 51 <sup>b-e</sup> | 54 <sup>b-e</sup> | 68 <sup>e</sup>   | 55 <sup>cde</sup> | 62 <sup>d-e</sup> | 54 <sup>b-e</sup> | 50 <sup>b-e</sup> | 25 <sup>a</sup>   |
| Too thick skin ***               | 22 <sup>a</sup>   | 18 <sup>a</sup>   | 32 <sup>ab</sup>  | 22 <sup>a</sup>   | 34 <sup>ab</sup>    | 58 <sup>c</sup>   | 39 <sup>abc</sup> | 55 <sup>bc</sup>  | 19 <sup>a</sup>   | 40 <sup>abc</sup> | 35 <sup>abc</sup> | 41 <sup>abc</sup> | 38 <sup>abc</sup> | 53 <sup>bc</sup>  | 48 <sup>bc</sup>  | 49 <sup>bc</sup>  |
| Too firm ***                     | 7 <sup>a</sup>    | 2 <sup>a</sup>    | 11 <sup>ab</sup>  | 16 <sup>ab</sup>  | 12 <sup>ab</sup>    | 15 <sup>ab</sup>  | 4 <sup>a</sup>    | 7 <sup>a</sup>    | 13 <sup>ab</sup>  | 17 <sup>ab</sup>  | 5 <sup>a</sup>    | 11 <sup>ab</sup>  | 10 <sup>ab</sup>  | 17 <sup>ab</sup>  | 24 <sup>b</sup>   | 42 <sup>c</sup>   |
| Mealy ***                        | 8 <sup>ab</sup>   | 14 <sup>a-d</sup> | 10 <sup>ab</sup>  | 15 <sup>a-d</sup> | 9 <sup>ab</sup>     | 28 <sup>cd</sup>  | 17 <sup>a-d</sup> | 23 <sup>bcd</sup> | 25 <sup>bcd</sup> | 4 <sup>a</sup>    | 11 <sup>abc</sup> | 15 <sup>a-d</sup> | 14 <sup>a-d</sup> | 12 <sup>abc</sup> | 13 <sup>abc</sup> | 31 <sup>d</sup>   |
| Too soft ***                     | 13 <sup>a-d</sup> | 29 <sup>de</sup>  | 5 <sup>ab</sup>   | 11 <sup>bcd</sup> | 12 <sup>abc</sup>   | 7 <sup>abc</sup>  | 34 <sup>e</sup>   | 23 <sup>cde</sup> | 13 <sup>a-d</sup> | 8 <sup>abc</sup>  | 20 <sup>b-e</sup> | 15 <sup>a-d</sup> | 18 <sup>b-e</sup> | 1 <sup>a</sup>    | 4 <sup>ab</sup>   | 8 <sup>abc</sup>  |
| Too many seeds ***               | 3 <sup>a</sup>    | 5 <sup>ab</sup>   | 3 <sup>a</sup>    | 1 <sup>a</sup>    | 7 <sup>ab</sup>     | 4 <sup>ab</sup>   | 5 <sup>ab</sup>   | 7 <sup>ab</sup>   | 0 <sup>a</sup>    | 3 <sup>a</sup>    | 6 <sup>ab</sup>   | 10 <sup>ab</sup>  | 14 <sup>b</sup>   | 5 <sup>ab</sup>   | 5 <sup>ab</sup>   | 10 <sup>ab</sup>  |
| Sweet ***                        | 62 <sup>d</sup>   | 46 <sup>a-d</sup> | 58 <sup>cd</sup>  | 50 <sup>cde</sup> | 51 <sup>bcd</sup>   | 42 <sup>a-d</sup> | 46 <sup>a-d</sup> | 41 <sup>a-d</sup> | 55 <sup>bcd</sup> | 50 <sup>bcd</sup> | 53 <sup>bcd</sup> | 32 <sup>ab</sup>  | 35 <sup>abc</sup> | 52 <sup>bcd</sup> | 66 <sup>d</sup>   | 23 <sup>a</sup>   |
| Too much acid ***                | 3 <sup>a</sup>    | 4 <sup>ab</sup>   | 15 <sup>abc</sup> | 13 <sup>abc</sup> | 10 <sup>abc</sup>   | 11 <sup>abc</sup> | 22 <sup>c</sup>   | 19 <sup>bc</sup>  | 2 <sup>a</sup>    | 23 <sup>c</sup>   | 16 <sup>abc</sup> | 13 <sup>abc</sup> | 11 <sup>abc</sup> | 15 <sup>abc</sup> | 6 <sup>ab</sup>   | 12 <sup>abc</sup> |
| Not enough sweet ***             | 30 <sup>a</sup>   | 37 <sup>ab</sup>  | 32 <sup>a</sup>   | 43 <sup>ab</sup>  | 39 <sup>ab</sup>    | 34 <sup>ab</sup>  | 30 <sup>a</sup>   | 40 <sup>ab</sup>  | 28 <sup>a</sup>   | 34 <sup>ab</sup>  | 37 <sup>ab</sup>  | 51 <sup>ab</sup>  | 47 <sup>ab</sup>  | 36 <sup>ab</sup>  | 31 <sup>a</sup>   | 56 <sup>b</sup>   |
| Bland / no taste ***             | 26 <sup>a-e</sup> | 42 <sup>c-f</sup> | 10 <sup>a</sup>   | 27 <sup>a-f</sup> | 35 <sup>b-f</sup>   | 43 <sup>def</sup> | 23 <sup>a-d</sup> | 26 <sup>a-e</sup> | 19 <sup>ab</sup>  | 20 <sup>abc</sup> | 14 <sup>ab</sup>  | 46 <sup>ef</sup>  | 49 <sup>fg</sup>  | 25 <sup>a-e</sup> | 22 <sup>a-d</sup> | 70 <sup>g</sup>   |
| Not pleasant aftertaste ***      | 13 <sup>abc</sup> | 20 <sup>bc</sup>  | 6 <sup>ab</sup>   | 10 <sup>abc</sup> | 12 <sup>abc</sup>   | 16 <sup>abc</sup> | 17 <sup>abc</sup> | 17 <sup>abc</sup> | 8 <sup>ab</sup>   | 10 <sup>abc</sup> | 12 <sup>abc</sup> | 12 <sup>abc</sup> | 7 <sup>ab</sup>   | 3 <sup>a</sup>    | 6 <sup>ab</sup>   | 26 <sup>c</sup>   |
| Aromatic /strong aroma ***       | 40 <sup>d</sup>   | 18 <sup>abc</sup> | 32 <sup>cd</sup>  | 24 <sup>a-d</sup> | 22 <sup>a-d</sup>   | 16 <sup>abc</sup> | 14 <sup>abc</sup> | 16 <sup>abc</sup> | 29 <sup>bcd</sup> | 15 <sup>abc</sup> | 20 <sup>abc</sup> | 11 <sup>ab</sup>  | 17 <sup>abc</sup> | 23 <sup>a-d</sup> | 23 <sup>a-d</sup> | 7 <sup>a</sup>    |

Aurea (AUR), Cauralina (CAU), Maillane (MAI), Marmande (MAR), Marmalindo (MLD), Marbonne (MNE), Muchamiel (MUC), Pera de Girona (PDG), Pomodoro di Sorrento (PDS), Valenciana (VAL). GH = greenhouse; OF = open field.

Traditional varieties are in grey.

Values within a row with common letters are not significantly different ( $p < 0.05$ ) Multiple pairwise comparisons based on McNemar's test. When a mean is followed by four or more letters, the range of letters is indicated.

Asterisks indicates significant differences according to Cochran's Q test at \* $p \leq 0.05$ , \*\* $p \leq 0.01$ , \*\*\* $p \leq 0.001$ , while ns indicates non-significant differences between samples.

**Table S7. Analysis of variance and means of sensory descriptors for varietal group (Modern/Traditional) and genotypes of tomato samples harvested at the early ripe stage (ER) in Italy (scale from 0 to 9, continuous; values are averages of two replicates).**

| Sensory descriptor | Varietal group (V) |                  |                  | Genotype (G) | Oxheart (Liguria)  |                    | Oxheart            |                    |                    |                    |                    |                   |                    | Marmande           |                    |                   |
|--------------------|--------------------|------------------|------------------|--------------|--------------------|--------------------|--------------------|--------------------|--------------------|--------------------|--------------------|-------------------|--------------------|--------------------|--------------------|-------------------|
|                    | (1)                | M                | T                |              | AUR                | PDG                | CAU                | MAI                | VAL                | RDS                | TLP                | PDS               | PDS2               | MNE                | MAR                | MUC               |
| External color     | 6.26*              | 5.3 <sup>a</sup> | 4.6 <sup>b</sup> | 2.00*        | 5.7                | 4.1                | 4.9                | 5.3                | 3.8                | 4.8                | 4.8                | 4.3               | 5.6                | 5.5                | 5.1                | 4.5               |
| Seeds              | <0.01              | 5.1              | 5.1              | 4.62***      | 5.6 <sup>ab</sup>  | 4.8 <sup>abc</sup> | 5.1 <sup>abc</sup> | 3.3 <sup>bc</sup>  | 5.0 <sup>abc</sup> | 2.6 <sup>c</sup>   | 4.6 <sup>abc</sup> | 3.3 <sup>bc</sup> | 4.7 <sup>abc</sup> | 5.7 <sup>ab</sup>  | 7.3 <sup>a</sup>   | 5.7 <sup>ab</sup> |
| Pulpiness          | 3.23               | 6.7              | 6.3              | 5.24***      | 6.5 <sup>a-d</sup> | 6.1 <sup>cd</sup>  | 6.7 <sup>a-d</sup> | 7.5 <sup>ab</sup>  | 6.2 <sup>bcd</sup> | 7.2 <sup>abc</sup> | 6.8 <sup>a-d</sup> | 7.7 <sup>a</sup>  | 7.2 <sup>abc</sup> | 6.7 <sup>a-d</sup> | 5.6 <sup>d</sup>   | 6.1 <sup>cd</sup> |
| Overall odor       | 1.21               | 6.9              | 6.7              | 1.30         | 6.9                | 6.6                | 6.7                | 6.1                | 6.7                | 7.0                | 6.7                | 7.3               | 7.1                | 7.1                | 6.7                | 6.8               |
| Tomato odor        | 0.72               | 6.3              | 6.1              | 0.73         | 6.2                | 6.0                | 6.3                | 5.9                | 6.0                | 6.4                | 6.0                | 6.5               | 6.6                | 6.3                | 6.0                | 6.0               |
| Sweet taste        | 2.99               | 4.0              | 3.6              | 4.6***       | 4.4 <sup>abc</sup> | 3.7 <sup>a-d</sup> | 3.5 <sup>a-d</sup> | 3.7 <sup>a-d</sup> | 2.9 <sup>d</sup>   | 4.7 <sup>ab</sup>  | 4.4 <sup>abc</sup> | 4.8 <sup>a</sup>  | 4.6 <sup>b</sup>   | 3.6 <sup>a-d</sup> | 3.3 <sup>bcd</sup> | 3.1 <sup>cd</sup> |
| Acid taste         | 1.81               | 3.4              | 3.0              | 4.30***      | 3.2 <sup>abc</sup> | 2.8 <sup>abc</sup> | 3.8 <sup>a</sup>   | 3.1 <sup>abc</sup> | 4.0 <sup>a</sup>   | 2.6 <sup>abc</sup> | 3.0 <sup>abc</sup> | 1.4 <sup>c</sup>  | 2.0 <sup>bc</sup>  | 3.7 <sup>ab</sup>  | 3.7 <sup>ab</sup>  | 3.3 <sup>ab</sup> |
| Overall flavor     | 6.58*              | 6.9 <sup>a</sup> | 6.4 <sup>b</sup> | 1.33         | 7.0                | 6.0                | 6.7                | 6.2                | 6.7                | 6.9                | 6.9                | 7.1               | 7.0                | 7.0                | 6.5                | 6.2               |
| Tomato flavor      | 6.41*              | 6.3 <sup>a</sup> | 5.7 <sup>b</sup> | 1.90*        | 6.4                | 5.5                | 6.1                | 5.6                | 5.6                | 6.2                | 6.5                | 6.7               | 6.5                | 6.2                | 5.7                | 5.2               |
| Firmness           | 3.95*              | 4.4 <sup>b</sup> | 4.9 <sup>a</sup> | 1.41         | 4.1                | 5.1                | 5.3                | 4.8                | 4.6                | 4.6                | 4.6                | 4.3               | 4.4                | 4.4                | 5.0                | 4.9               |
| Juiciness          | 16.57***           | 7.1 <sup>a</sup> | 6.1 <sup>b</sup> | 2.79**       | 7.3 <sup>a</sup>   | 5.5 <sup>b</sup>   | 6.7 <sup>ab</sup>  | 6.1 <sup>ab</sup>  | 6.5 <sup>ab</sup>  | 5.9 <sup>ab</sup>  | 6.8 <sup>ab</sup>  | 6.3 <sup>ab</sup> | 6.4 <sup>ab</sup>  | 7.6 <sup>a</sup>   | 7.0 <sup>ab</sup>  | 6.2 <sup>ab</sup> |
| Mealiness          | 1.66               | 2.3              | 2.7              | 1.46         | 2.8                | 3.3                | 2.4                | 3.1                | 2.7                | 3.0                | 1.8                | 3.4               | 3.2                | 1.6                | 1.7                | 2.1               |
| Skin thickness     | 0.15               | 4.8              | 5.0              | 0.31         | 4.6                | 5.0                | 5.3                | 4.8                | 5.5                | 4.8                | 4.6                | 5.0               | 4.9                | 5.0                | 5.0                | 4.7               |

Aurea (AUR), Cauralina (CAU), Maillane (MAI), Marmande (MAR), Marbonne (MNE), Muchamiel (MUC), Pera de Girona (PDG), Pomodoro di Sorrento (PDS), Pomodoro di Sorrento (Landrace 2) (PDS2), Rosa di Sorrento (RDS), Toi Ls Pan (TLP), Valenciana (VAL). Traditional varieties are in grey.

M= Modern varieties; T=Traditional varieties.

(1) F value; \*p ≤ 0.05; \*\*p ≤ 0.01; \*\*\*p ≤ 0.001

Within each testing condition, means with common superscript letters are not significantly different (p ≤ 0.05) according to the Tukey's (HSD) *post hoc* test. When a mean is followed by four or more letters, the range of letters is indicated.

**Table S8. Analysis of variance and means of physicochemical parameters for varietal group (Modern/Traditional) and genotypes of tomato samples harvested at the early ripe (ER) stage in Italy (values are averages of four replicates).**

| Physicochemical parameter | Varietal group (V) |                   |                   | Genotype (G) | Oxheart (Liguria)   |                    | Oxheart             |                    |                     |                     |                     |                    |                     | Marmande           |                     |                    |
|---------------------------|--------------------|-------------------|-------------------|--------------|---------------------|--------------------|---------------------|--------------------|---------------------|---------------------|---------------------|--------------------|---------------------|--------------------|---------------------|--------------------|
|                           | (1)                | M                 | T                 | (1)          | AUR                 | PDG                | CAU                 | MAI                | VAL                 | RDS                 | TLP                 | PDS                | PDS2                | MNE                | MAR                 | MUC                |
| FW (g)                    | 0.08               | 229               | 225               | 8.96***      | 181 <sup>d</sup>    | 223 <sup>bcd</sup> | 169 <sup>d</sup>    | 218 <sup>cd</sup>  | 301 <sup>a</sup>    | 260 <sup>abc</sup>  | 293 <sup>ab</sup>   | 272 <sup>abc</sup> | 241 <sup>a-d</sup>  | 266 <sup>abc</sup> | 176 <sup>d</sup>    | 213 <sup>cd</sup>  |
| EC_L*                     | 0.01               | 48.8              | 48.9              | 3.89***      | 51.5 <sup>a</sup>   | 48.4 <sup>ab</sup> | 43.9 <sup>b</sup>   | 49.2 <sup>a</sup>  | 49.2 <sup>a</sup>   | 49.0 <sup>a</sup>   | 48.1 <sup>ab</sup>  | 51.5 <sup>a</sup>  | 50.5 <sup>a</sup>   | 48.0 <sup>ab</sup> | 47.4 <sup>ab</sup>  | 48.94 <sup>a</sup> |
| EC_a*                     | 4.05               | 9.5               | 5.6               | 1.68         | 10.9                | 7.7                | 7.5                 | 10.1               | 8.4                 | 9.2                 | 12.0                | 1.2                | 7.5                 | 8.0                | 4.3                 | 0.1                |
| EC_b*                     | 2.95               | 27.1              | 28.8              | 14.4***      | 29.1 <sup>ab</sup>  | 28.4 <sup>bc</sup> | 24.3 <sup>cde</sup> | 29.7 <sup>ab</sup> | 29.41 <sup>ab</sup> | 25.5 <sup>bcd</sup> | 20.51 <sup>e</sup>  | 28.4 <sup>bc</sup> | 23.3 <sup>de</sup>  | 28.8 <sup>ab</sup> | 27.3 <sup>bcd</sup> | 33.2 <sup>a</sup>  |
| FIRM (D.I.)               | 0.61               | 78.1              | 75.7              | 0.89         | 81.4                | 70.6               | 73.7                | 72.0               | 74.3                | 80.1                | 73.9                | 83.6               | 77.7                | 77.1               | 75.4                | 83.6               |
| SSC (°Bx)                 | 2.50               | 4.7               | 4.6               | 10.90***     | 4.7 <sup>abc</sup>  | 4.7 <sup>abc</sup> | 4.6 <sup>abc</sup>  | 4.5 <sup>bc</sup>  | 4.7 <sup>abc</sup>  | 5.0 <sup>a</sup>    | 4.7 <sup>abc</sup>  | 5.0 <sup>ab</sup>  | 4.9 <sup>abc</sup>  | 4.6 <sup>abc</sup> | 4.5 <sup>c</sup>    | 3.9 <sup>d</sup>   |
| TA (g CA/100g)            | 8.45***            | 0.60 <sup>a</sup> | 0.53 <sup>b</sup> | 14.72***     | 0.54 <sup>d</sup>   | 0.49 <sup>de</sup> | 0.65 <sup>ab</sup>  | 0.54 <sup>cd</sup> | 0.65 <sup>ab</sup>  | 0.53 <sup>d</sup>   | 0.57 <sup>bcd</sup> | 0.50 <sup>de</sup> | 0.57 <sup>bcd</sup> | 0.69 <sup>a</sup>  | 0.64 <sup>abc</sup> | 0.41 <sup>e</sup>  |
| pH                        | 20.88***           | 4.07 <sup>b</sup> | 4.16 <sup>a</sup> | 24.53***     | 4.13 <sup>bcd</sup> | 4.19 <sup>ab</sup> | 4.04 <sup>ef</sup>  | 4.20 <sup>ab</sup> | 4.08 <sup>cde</sup> | 4.16 <sup>abc</sup> | 4.08 <sup>de</sup>  | 4.20 <sup>ab</sup> | 4.12 <sup>cd</sup>  | 3.98 <sup>f</sup>  | 4.06 <sup>de</sup>  | 4.22 <sup>a</sup>  |

Aurea (AUR), Cauralina (CAU), Maillane (MAI), Marmande (MAR), Marmalindo (MLD), Marbonne (MNE), Muchamiel (MUC), Pera de Girona (PDG), Pomodoro di Sorrento (PDS), Pomodoro di Sorrento (Landrace 2) (PDS2), Rosa di Sorrento (RDS), Toi Ls Pan (TLP), Valenciana (VAL). Traditional varieties are in grey.

FW= fruit weight, SSC= Soluble solids content, EC =external color, TA= titratable acidity, FIRM = firmness (Durofel); °Bx = degrees Brix; D.I. = Durofel Index.

M= Modern variety; T=Traditional variety.

<sup>(1)</sup> F value; \*p ≤ 0.05; \*\*p ≤ 0.01; \*\*\*p ≤ 0.001

Within each testing condition, means with common superscript letters are not significantly different (p ≤ 0.05) according to the Tukey's (HSD) *post hoc* test. When a mean is followed by four or more letters, the range of letters is indicated.

**Table S9. Analysis of variance and mean of sensory descriptors for varietal group (Modern/Traditional) and genotypes of tomato samples harvested at the red ripe stage (RR) in Italy (scale from 0 to 9, continuous; values are averages of two replicates).**

| Sensory descriptor | Varietal group (V) |                  |                  | Genotype (G) | Oxheart (Liguria)  |                    | Oxheart            |                   |                    |                   |                   |                  |                   | Marmande          |                   |                    |
|--------------------|--------------------|------------------|------------------|--------------|--------------------|--------------------|--------------------|-------------------|--------------------|-------------------|-------------------|------------------|-------------------|-------------------|-------------------|--------------------|
|                    | (1)                | M                | T                |              | AUR                | PDG                | CAU                | MAI               | VAL                | RDS               | TLP               | PDS              | PDS2              | MNE               | MAR               | MUC                |
| External color     | 0.54               | 7.6              | 7.4              | 2.52**       | 7.8 <sup>ab</sup>  | 7.8 <sup>a</sup>   | 6.7 <sup>ab</sup>  | 7.4 <sup>ab</sup> | 7.5 <sup>ab</sup>  | 7.1 <sup>ab</sup> | 7.8 <sup>ab</sup> | 6.4 <sup>b</sup> | 7.3 <sup>ab</sup> | 7.7 <sup>ab</sup> | 7.6 <sup>ab</sup> | 6.9 <sup>ab</sup>  |
| Seeds              | 0.02               | 4.9              | 4.8              | 4.87***      | 5.0 <sup>abc</sup> | 5.3 <sup>abc</sup> | 4.6 <sup>abc</sup> | 3.24 <sup>c</sup> | 4.6 <sup>abc</sup> | 2.5 <sup>c</sup>  | 3.02 <sup>c</sup> | 2.6 <sup>c</sup> | 3.5 <sup>bc</sup> | 6.2 <sup>ab</sup> | 6.7 <sup>a</sup>  | 4.5 <sup>abc</sup> |
| Pulpiness          | 0.08               | 6.8              | 6.7              | 1.78         | 6.6                | 6.6                | 6.9                | 7.2               | 6.4                | 7.5               | 7.5               | 7.3              | 7.4               | 6.4               | 5.9               | 7.0                |
| Overall odor       | 6.18*              | 7.5 <sup>a</sup> | 7.2 <sup>b</sup> | 2.02*        | 7.1                | 7.2                | 7.3                | 7.0               | 7.0                | 7.7               | 7.8               | 7.0              | 7.2               | 7.7               | 7.1               | 7.4                |
| Tomato odor        | 3.74               | 7.2              | 6.8              | 1.43         | 6.7                | 6.9                | 7.0                | 6.8               | 6.7                | 7.4               | 7.3               | 6.9              | 6.9               | 7.5               | 6.6               | 7.0                |
| Sweet taste        | 4.58*              | 5.3 <sup>a</sup> | 4.9 <sup>b</sup> | 4.24***      | 5.5 <sup>ab</sup>  | 5.3 <sup>ab</sup>  | 5.4 <sup>ab</sup>  | 4.9 <sup>ab</sup> | 4.7 <sup>ab</sup>  | 5.6 <sup>a</sup>  | 6.0 <sup>a</sup>  | 5.6 <sup>a</sup> | 5.6 <sup>a</sup>  | 4.7 <sup>ab</sup> | 4.3 <sup>b</sup>  | 4.3 <sup>b</sup>   |
| Acid taste         | 0.56               | 2.0              | 1.8              | 4.37***      | 1.7 <sup>ab</sup>  | 1.6 <sup>b</sup>   | 1.1 <sup>b</sup>   | 1.9 <sup>ab</sup> | 2.1 <sup>ab</sup>  | 1.1 <sup>b</sup>  | 2.0 <sup>ab</sup> | 1.0 <sup>b</sup> | 1.1 <sup>b</sup>  | 2.8 <sup>a</sup>  | 2.3 <sup>b</sup>  | 2.3 <sup>ab</sup>  |
| Overall flavor     | 4.87*              | 7.6 <sup>a</sup> | 7.1 <sup>b</sup> | 0.85         | 7.5                | 7.2                | 7.5                | 7.1               | 7.0                | 7.7               | 7.8               | 7.2              | 7.4               | 7.6               | 6.9               | 6.8                |
| Tomato flavor      | 3.90               | 7.3              | 6.8              | 0.81         | 7.1                | 6.8                | 7.3                | 6.8               | 6.6                | 7.3               | 7.7               | 7.0              | 7.2               | 7.4               | 6.6               | 6.5                |
| Firmness           | 0.17               | 4.3              | 4.2              | 2.98**       | 4.6 <sup>b</sup>   | 3.3 <sup>b</sup>   | 4.4 <sup>ab</sup>  | 4.9 <sup>a</sup>  | 4.1 <sup>ab</sup>  | 4.2 <sup>ab</sup> | 3.9 <sup>ab</sup> | 5.3 <sup>a</sup> | 4.2 <sup>ab</sup> | 4.1 <sup>ab</sup> | 4.8 <sup>a</sup>  | 4.6 <sup>ab</sup>  |
| Juiciness          | 2.78               | 7.6              | 7.2              | 0.64         | 7.4                | 7.2                | 7.6                | 6.9               | 7.3                | 7.3               | 7.6               | 7.2              | 7.2               | 7.8               | 7.5               | 7.2                |
| Mealiness          | 0.07               | 1.4              | 1.5              | 0.22         | 1.0                | 1.6                | 1.3                | 1.3               | 1.7                | 1.9               | 1.5               | 1.3              | 1.2               | 1.5               | 1.2               | 1.5                |
| Skin thickness     | 1.76               | 5.2              | 4.7              | 0.61         | 5.0                | 4.1                | 5.1                | 4.9               | 4.9                | 4.6               | 5.0               | 5.2              | 4.5               | 5.5               | 5.1               | 5.3                |

Aurea (AUR), Cauralina (CAU), Maillane (MAI), Marmande (MAR), Marbonne (MNE), Muchamiel (MUC), Pera de Girona (PDG), Pomodoro di Sorrento (PDS), Pomodoro di Sorrento (Landrace 2) (PDS2), Rosa Di Sorrento (RDS), Toi Ls Pan (TLP), Valenciana (VAL). Traditional varieties are in grey

M= Modern varieties; T=Traditional varieties

(1) F value; \*p ≤ 0.05; \*\*p ≤ 0.01; \*\*\*p ≤ 0.001

Within each testing condition, means with common superscript letters are not significantly different (p ≤ 0.05) according to the Tukey's (HSD) *post hoc* test.

**Table S10. Analysis of variance and means of physicochemical parameters for varietal group (Modern/Traditional) and genotypes of tomato samples harvested at the red ripe stage (RR) in Italy (values are averages of four replicates).**

| Physicochemical parameter | Varietal group (V) |                   |                   | Genotype (G) | Oxheart             |                     |                    |                     |                     |                     |                     |                     |                     | Marmande           |                     |                     |
|---------------------------|--------------------|-------------------|-------------------|--------------|---------------------|---------------------|--------------------|---------------------|---------------------|---------------------|---------------------|---------------------|---------------------|--------------------|---------------------|---------------------|
|                           | (1)                | M                 | T                 | (1)          | AUR                 | PDG                 | CAU                | MAI                 | VAL                 | RDS                 | TLP                 | PDS                 | PDS2                | MNE                | MAR                 | MUC                 |
| FW (g)                    | 1.76               | 214               | 199               | 6.98***      | 183 <sup>cd</sup>   | 204 <sup>bcd</sup>  | 177 <sup>cd</sup>  | 210 <sup>a-d</sup>  | 249 <sup>ab</sup>   | 247 <sup>ab</sup>   | 272 <sup>a</sup>    | 207 <sup>bcd</sup>  | 201 <sup>bcd</sup>  | 228 <sup>abc</sup> | 156 <sup>d</sup>    | 195 <sup>bcd</sup>  |
| EC_L*                     | 0.86               | 39.8              | 40.3              | 6.58***      | 39.9 <sup>cd</sup>  | 40.2 <sup>bcd</sup> | 38.6 <sup>d</sup>  | 39.64 <sup>cd</sup> | 43.0 <sup>ab</sup>  | 43.2 <sup>a</sup>   | 39.8 <sup>cd</sup>  | 42.0 <sup>abc</sup> | 40.0 <sup>cd</sup>  | 38.9 <sup>d</sup>  | 38.9 <sup>d</sup>   | 40.5 <sup>a-d</sup> |
| EC_a*                     | 22.21***           | 22.9 <sup>a</sup> | 20.5 <sup>b</sup> | 11.12***     | 23.1 <sup>ab</sup>  | 18.7 <sup>d</sup>   | 20.0 <sup>cd</sup> | 23.8 <sup>a</sup>   | 20.7 <sup>bcd</sup> | 22.0 <sup>abc</sup> | 22.8 <sup>ab</sup>  | 22.7 <sup>ab</sup>  | 20.8 <sup>bcd</sup> | 24.1 <sup>a</sup>  | 19.8 <sup>cd</sup>  | 22.1 <sup>abc</sup> |
| EC_b*                     | 0.40               | 23.7              | 24.5              | 26.18***     | 25.3 <sup>b</sup>   | 25.2 <sup>b</sup>   | 24.2 <sup>bc</sup> | 25.9 <sup>ab</sup>  | 29.77 <sup>a</sup>  | 20.5 <sup>cd</sup>  | 16.45 <sup>e</sup>  | 18.7 <sup>de</sup>  | 16.8 <sup>de</sup>  | 25.4 <sup>b</sup>  | 24.7 <sup>b</sup>   | 26.5 <sup>ab</sup>  |
| FIRM (D.I.)               | 0.27               | 52.8              | 51.8              | 3.81**       | 49.1 <sup>b</sup>   | 46.1 <sup>b</sup>   | 51.5 <sup>ab</sup> | 50.7 <sup>b</sup>   | 57.4 <sup>ab</sup>  | 62.9 <sup>a</sup>   | 51.4 <sup>ab</sup>  | 57.3 <sup>ab</sup>  | 56.4 <sup>ab</sup>  | 54.2 <sup>ab</sup> | 49.6 <sup>b</sup>   | 58.0 <sup>ab</sup>  |
| SSC (°Bx)                 | 8.81**             | 5.5 <sup>a</sup>  | 5.2 <sup>b</sup>  | 6.37***      | 5.5 <sup>a</sup>    | 5.4 <sup>a</sup>    | 5.3 <sup>a</sup>   | 5.1 <sup>a</sup>    | 5.2 <sup>a</sup>    | 5.6 <sup>a</sup>    | 5.4 <sup>a</sup>    | 5.5 <sup>a</sup>    | 5.5 <sup>a</sup>    | 5.4 <sup>a</sup>   | 5.0 <sup>a</sup>    | 4.3 <sup>b</sup>    |
| TA (g CA/100g)            | 37.01***           | 0.59 <sup>a</sup> | 0.49 <sup>b</sup> | 30.09***     | 0.51 <sup>cd</sup>  | 0.40 <sup>e</sup>   | 0.60 <sup>b</sup>  | 0.46 <sup>de</sup>  | 0.59 <sup>b</sup>   | 0.51 <sup>cd</sup>  | 0.56 <sup>bc</sup>  | 0.49 <sup>cd</sup>  | 0.48 <sup>d</sup>   | 0.71 <sup>a</sup>  | 0.60 <sup>b</sup>   | 0.56 <sup>bc</sup>  |
| pH                        | 24.82***           | 4.1 <sup>b</sup>  | 4.2 <sup>a</sup>  | 20.75***     | 4.20 <sup>bcd</sup> | 4.29 <sup>ab</sup>  | 4.05 <sup>fg</sup> | 4.33 <sup>a</sup>   | 4.17 <sup>cde</sup> | 4.20 <sup>bcd</sup> | 4.07 <sup>efg</sup> | 4.25 <sup>abc</sup> | 4.23 <sup>bc</sup>  | 3.98 <sup>g</sup>  | 4.29 <sup>def</sup> | 4.07 <sup>efg</sup> |

Aurea (AUR), Cauralina (CAU), Maillane (MAI), Marmande (MAR), Marmalindo (MLD), Marbonne (MNE), Muchamiel (MUC), Pera de Girona (PDG), Pomodoro di Sorrento (PDS), Pomodoro di Sorrento (Landrace 2) (PDS2), Rosa di Sorrento (RDS), Toi Ls Pan (TLP), Valenciana (VAL). Traditional varieties are in grey.

M= Modern variety; T=Traditional variety.

FW= fruit weight, SSC= Soluble solids content, EC =external color, TA= titratable acidity, FIRM = firmness (Durofel); °Bx = degrees Brix; D.I. = Durofel Index.

<sup>(1)</sup> F value; \*p ≤ 0.05; \*\*p ≤ 0.01; \*\*\*p ≤ 0.001

Within each testing condition, means with common superscript letters are not significantly different (p ≤ 0.05) according to the Tukey's (HSD) *post hoc* test. When a mean is followed by four or more letters, the range of letters is indicated.



**Table S11. Contingency table of the frequencies of mentions by Italian consumers (n=107 eligible consumers) across all 12 tomato samples, evaluated at the early ripe (ER) stage, for individual terms of the CATA questions.**

| CATA Term                                  | Oxheart (Liguria) |                   | Oxheart           |                   |                   |                   |                   |                   |                   | Marmande          |                   |                   |
|--------------------------------------------|-------------------|-------------------|-------------------|-------------------|-------------------|-------------------|-------------------|-------------------|-------------------|-------------------|-------------------|-------------------|
|                                            | AUR               | PDG               | CAU               | MAI               | VAL               | RDS               | TLP               | PDS               | PDS2              | MNE               | MAR               | MUC               |
| Beautiful color ***                        | 70 <sup>f</sup>   | 55 <sup>b-e</sup> | 70 <sup>f</sup>   | 59 <sup>c-f</sup> | 41 <sup>ab</sup>  | 60 <sup>c-f</sup> | 48 <sup>abc</sup> | 66 <sup>def</sup> | 53 <sup>bcd</sup> | 69 <sup>ef</sup>  | 66 <sup>def</sup> | 38 <sup>a</sup>   |
| I like its appearance ***                  | 62 <sup>cde</sup> | 52 <sup>a-d</sup> | 65 <sup>de</sup>  | 46 <sup>ab</sup>  | 44 <sup>ab</sup>  | 49 <sup>abc</sup> | 52 <sup>bcd</sup> | 70 <sup>e</sup>   | 52 <sup>bcd</sup> | 61 <sup>cde</sup> | 56 <sup>b-e</sup> | 37 <sup>a</sup>   |
| Too green ***                              | 21 <sup>a</sup>   | 32 <sup>abc</sup> | 26 <sup>a</sup>   | 33 <sup>abc</sup> | 46 <sup>cd</sup>  | 39 <sup>bcd</sup> | 53 <sup>d</sup>   | 26 <sup>ab</sup>  | 43 <sup>cd</sup>  | 33 <sup>abc</sup> | 41 <sup>cd</sup>  | 75 <sup>e</sup>   |
| Too big ***                                | 20 <sup>ab</sup>  | 33 <sup>cd</sup>  | 12 <sup>a</sup>   | 41 <sup>cd</sup>  | 32 <sup>bc</sup>  | 42 <sup>cd</sup>  | 41 <sup>cd</sup>  | 45 <sup>d</sup>   | 40 <sup>cd</sup>  | 42 <sup>cd</sup>  | 9 <sup>a</sup>    | 19 <sup>ab</sup>  |
| I like its fleshy aspect <sup>ns</sup>     | 70                | 61                | 67                | 66                | 55                | 61                | 59                | 70                | 63                | 73                | 58                | 57                |
| Too red **                                 | 12 <sup>b</sup>   | 13 <sup>bc</sup>  | 9 <sup>ab</sup>   | 12 <sup>b</sup>   | 16 <sup>bc</sup>  | 12 <sup>b</sup>   | 8 <sup>ab</sup>   | 23 <sup>c</sup>   | 12 <sup>b</sup>   | 18 <sup>bc</sup>  | 8 <sup>ab</sup>   | 4 <sup>a</sup>    |
| I do not like its appearance <sup>ns</sup> | 51                | 51                | 57                | 53                | 56                | 50                | 44                | 44                | 49                | 47                | 42                | 53                |
| Too pale color ***                         | 39 <sup>b-e</sup> | 44 <sup>c-f</sup> | 35 <sup>a-d</sup> | 47 <sup>d-g</sup> | 55 <sup>fg</sup>  | 30 <sup>abc</sup> | 60 <sup>g</sup>   | 30 <sup>ab</sup>  | 47 <sup>d-g</sup> | 25 <sup>a</sup>   | 35 <sup>a-d</sup> | 53 <sup>efg</sup> |
| Hollow fruit ***                           | 9 <sup>a</sup>    | 39 <sup>e</sup>   | 10 <sup>abc</sup> | 18 <sup>a-d</sup> | 18 <sup>a-d</sup> | 17 <sup>a-d</sup> | 19 <sup>abd</sup> | 23 <sup>d</sup>   | 19 <sup>a-d</sup> | 9 <sup>a</sup>    | 18 <sup>a-d</sup> | 19 <sup>a-d</sup> |
| Too small ***                              | 20 <sup>cd</sup>  | 16 <sup>bc</sup>  | 31 <sup>e</sup>   | 16 <sup>bc</sup>  | 12 <sup>abc</sup> | 7 <sup>a</sup>    | 10 <sup>ab</sup>  | 8 <sup>ab</sup>   | 15 <sup>abc</sup> | 14 <sup>abc</sup> | 40 <sup>e</sup>   | 28 <sup>de</sup>  |
| Too much jelly and seeds ***               | 28 <sup>bcd</sup> | 36 <sup>de</sup>  | 19 <sup>ab</sup>  | 13 <sup>a</sup>   | 31 <sup>bcd</sup> | 25 <sup>bcd</sup> | 23 <sup>abc</sup> | 19 <sup>ab</sup>  | 22 <sup>abc</sup> | 35 <sup>cde</sup> | 47 <sup>e</sup>   | 34 <sup>cde</sup> |
| Juicy ***                                  | 79 <sup>cd</sup>  | 66 <sup>bc</sup>  | 78 <sup>cd</sup>  | 62 <sup>ab</sup>  | 77 <sup>cd</sup>  | 75 <sup>bcd</sup> | 69 <sup>bc</sup>  | 82 <sup>d</sup>   | 71 <sup>bcd</sup> | 80 <sup>cd</sup>  | 82 <sup>d</sup>   | 50 <sup>a</sup>   |
| Too thick skin ***                         | 31 <sup>ab</sup>  | 46 <sup>cd</sup>  | 24 <sup>a</sup>   | 38 <sup>bc</sup>  | 42 <sup>bc</sup>  | 41 <sup>bc</sup>  | 42 <sup>bc</sup>  | 33 <sup>abc</sup> | 57 <sup>de</sup>  | 45 <sup>bcd</sup> | 35 <sup>abc</sup> | 62 <sup>e</sup>   |
| Too firm ***                               | 23 <sup>ab</sup>  | 20 <sup>ab</sup>  | 24 <sup>abc</sup> | 28 <sup>bcd</sup> | 29 <sup>bcd</sup> | 21 <sup>ab</sup>  | 40 <sup>d</sup>   | 12 <sup>a</sup>   | 30 <sup>bcd</sup> | 28 <sup>bcd</sup> | 36 <sup>cd</sup>  | 64 <sup>e</sup>   |
| Mealy ***                                  | 29 <sup>abc</sup> | 37 <sup>b-e</sup> | 25 <sup>ab</sup>  | 30 <sup>a-d</sup> | 36 <sup>bcd</sup> | 50 <sup>e</sup>   | 30 <sup>a-d</sup> | 43 <sup>de</sup>  | 39 <sup>cde</sup> | 34 <sup>bcd</sup> | 19 <sup>a</sup>   | 27 <sup>abc</sup> |
| Too soft **                                | 22 <sup>abc</sup> | 32 <sup>c</sup>   | 21 <sup>abc</sup> | 17 <sup>ab</sup>  | 33 <sup>c</sup>   | 28 <sup>bc</sup>  | 18 <sup>ab</sup>  | 30 <sup>c</sup>   | 29 <sup>bc</sup>  | 26 <sup>bc</sup>  | 26 <sup>bc</sup>  | 12 <sup>a</sup>   |
| Too many seeds ***                         | 24 <sup>abc</sup> | 33 <sup>c</sup>   | 17 <sup>a</sup>   | 13 <sup>a</sup>   | 29 <sup>bc</sup>  | 22 <sup>abc</sup> | 19 <sup>ab</sup>  | 14 <sup>a</sup>   | 19 <sup>ab</sup>  | 36 <sup>cd</sup>  | 49 <sup>d</sup>   | 30 <sup>bc</sup>  |
| Sweet ***                                  | 58 <sup>cd</sup>  | 51 <sup>bcd</sup> | 50 <sup>bc</sup>  | 52 <sup>bcd</sup> | 39 <sup>ab</sup>  | 64 <sup>d</sup>   | 50 <sup>bcd</sup> | 65 <sup>d</sup>   | 53 <sup>bcd</sup> | 52 <sup>bcd</sup> | 52 <sup>bcd</sup> | 34 <sup>a</sup>   |
| Too much acid ***                          | 36 <sup>bc</sup>  | 40 <sup>bc</sup>  | 40 <sup>bc</sup>  | 30 <sup>ab</sup>  | 57 <sup>d</sup>   | 31 <sup>ab</sup>  | 31 <sup>ab</sup>  | 22 <sup>a</sup>   | 31 <sup>ab</sup>  | 45 <sup>cd</sup>  | 48 <sup>cd</sup>  | 47 <sup>cd</sup>  |
| Not enough sweet <sup>ns</sup>             | 55                | 50                | 54                | 56                | 64                | 58                | 46                | 49                | 54                | 57                | 43                | 63                |
| Bland / no taste **                        | 33 <sup>a</sup>   | 50 <sup>bc</sup>  | 38 <sup>ab</sup>  | 34 <sup>a</sup>   | 43 <sup>ab</sup>  | 45 <sup>ab</sup>  | 45 <sup>ab</sup>  | 38 <sup>ab</sup>  | 40 <sup>ab</sup>  | 39 <sup>ab</sup>  | 36 <sup>ab</sup>  | 60 <sup>c</sup>   |
| Not pleasant aftertaste ***                | 32 <sup>abc</sup> | 37 <sup>abc</sup> | 42 <sup>b-e</sup> | 30 <sup>ab</sup>  | 55 <sup>e</sup>   | 34 <sup>abc</sup> | 46 <sup>cde</sup> | 25 <sup>a</sup>   | 42 <sup>b-e</sup> | 38 <sup>a-d</sup> | 41 <sup>b-e</sup> | 52 <sup>de</sup>  |
| Pleasant aroma <sup>ns</sup>               | 64                | 53                | 59                | 56                | 53                | 65                | 61                | 64                | 69                | 50                | 67                | 57                |
| Aromatic/strong aroma*                     | 54 <sup>bc</sup>  | 44 <sup>abc</sup> | 47 <sup>bc</sup>  | 43 <sup>ab</sup>  | 49 <sup>bc</sup>  | 47 <sup>bc</sup>  | 52 <sup>bc</sup>  | 44 <sup>abc</sup> | 48 <sup>bc</sup>  | 57 <sup>bc</sup>  | 58 <sup>c</sup>   | 33 <sup>a</sup>   |

Aurea (AUR), Cauralina (CAU), Maillane (MAI), Marmande (MAR), Marbonne (MNE), Muchamiel (MUC), Pera de Girona (PDG), Pomodoro di Sorrento (PDS), Pomodoro di Sorrento (Landrace 2) (PDS2), Rosa Di Sorrento (RDS), Toi Ls Pan (TLP), Valenciana (VAL). Traditional varieties are in grey.

Values within a row with common letters are not significantly different ( $p \leq 0.05$ ). Multiple pairwise comparisons based on McNemar's test. When a mean is followed by four or more letters, the range of letters is indicated. Asterisks indicate significant differences according to Cochran's Q test at \* $p \leq 0.05$ , \*\* $p \leq 0.01$ , \*\*\* $p \leq 0.001$ , while ns indicates non-significant differences between samples.

**Table S12. Contingency table of the frequencies of mentions by Italian consumers (n=107 eligible consumers) across all 8 tomato samples, evaluated at the red ripe (RR) stage, for individual terms of the CATA questions.**

| CATA Term                                  | Oxheart (Liguria) |                   | Oxheart           |                  |                   |                   | Marmande          |                   |
|--------------------------------------------|-------------------|-------------------|-------------------|------------------|-------------------|-------------------|-------------------|-------------------|
|                                            | AUR               | PDG               | CAU               | MAI              | VAL               | PDS               | MNE               | MAR               |
| Beautiful color *                          | 74 <sup>abc</sup> | 74 <sup>abc</sup> | 83 <sup>c</sup>   | 65 <sup>ab</sup> | 72 <sup>abc</sup> | 62 <sup>a</sup>   | 73 <sup>abc</sup> | 77 <sup>bc</sup>  |
| I like its appearance <sup>ns</sup>        | 66                | 66                | 71                | 58               | 61                | 59                | 68                | 66                |
| Too green **                               | 4 <sup>abc</sup>  | 6 <sup>abc</sup>  | 1 <sup>a</sup>    | 2 <sup>ab</sup>  | 12 <sup>c</sup>   | 10 <sup>c</sup>   | 4 <sup>abc</sup>  | 7 <sup>bc</sup>   |
| Too big ***                                | 14 <sup>abc</sup> | 16 <sup>bc</sup>  | 10 <sup>ab</sup>  | 34 <sup>de</sup> | 21 <sup>c</sup>   | 39 <sup>e</sup>   | 24 <sup>cd</sup>  | 6 <sup>a</sup>    |
| I like its fleshy appearance <sup>ns</sup> | 68                | 67                | 71                | 66               | 66                | 65                | 72                | 60                |
| Too red ***                                | 60 <sup>cd</sup>  | 48 <sup>a-d</sup> | 47 <sup>abc</sup> | 60 <sup>d</sup>  | 40 <sup>ab</sup>  | 59 <sup>cd</sup>  | 53 <sup>bcd</sup> | 38 <sup>a</sup>   |
| I do not like its appearance <sup>ns</sup> | 39                | 45                | 44                | 43               | 49                | 45                | 47                | 45                |
| Too pale color *                           | 4 <sup>a</sup>    | 14 <sup>c</sup>   | 6 <sup>abc</sup>  | 5 <sup>ab</sup>  | 13 <sup>bc</sup>  | 12 <sup>abc</sup> | 9 <sup>abc</sup>  | 14 <sup>c</sup>   |
| Hollow fruit ***                           | 14 <sup>ab</sup>  | 37 <sup>c</sup>   | 11 <sup>ab</sup>  | 8 <sup>a</sup>   | 18 <sup>ab</sup>  | 21 <sup>b</sup>   | 10 <sup>ab</sup>  | 15 <sup>ab</sup>  |
| Too small ***                              | 28 <sup>c</sup>   | 14 <sup>ab</sup>  | 35 <sup>c</sup>   | 10 <sup>a</sup>  | 11 <sup>a</sup>   | 9 <sup>a</sup>    | 23 <sup>bc</sup>  | 53 <sup>d</sup>   |
| Too much jelly and seeds ***               | 38 <sup>cde</sup> | 46 <sup>de</sup>  | 19 <sup>a</sup>   | 25 <sup>ab</sup> | 28 <sup>abc</sup> | 33 <sup>bcd</sup> | 39 <sup>cde</sup> | 51 <sup>e</sup>   |
| Juicy <sup>ns</sup>                        | 97                | 96                | 92                | 93               | 88                | 87                | 97                | 96                |
| Too thick skin <sup>ns</sup>               | 24                | 25                | 23                | 28               | 33                | 27                | 30                | 23                |
| Too firm *                                 | 3 <sup>ab</sup>   | 3 <sup>ab</sup>   | 8 <sup>b</sup>    | 0 <sup>a</sup>   | 7 <sup>b</sup>    | 11 <sup>b</sup>   | 5 <sup>ab</sup>   | 4 <sup>ab</sup>   |
| Mealy <sup>ns</sup>                        | 39                | 35                | 31                | 37               | 42                | 36                | 29                | 26                |
| Too soft ***                               | 61 <sup>bc</sup>  | 74 <sup>c</sup>   | 51 <sup>b</sup>   | 67 <sup>c</sup>  | 44 <sup>a</sup>   | 51 <sup>ab</sup>  | 51 <sup>ab</sup>  | 48 <sup>ab</sup>  |
| Too many seeds ***                         | 35 <sup>bc</sup>  | 45 <sup>cd</sup>  | 24 <sup>ab</sup>  | 19 <sup>a</sup>  | 26 <sup>ab</sup>  | 32 <sup>bc</sup>  | 38 <sup>bc</sup>  | 55 <sup>d</sup>   |
| Sweet <sup>ns</sup>                        | 64                | 63                | 64                | 62               | 58                | 64                | 62                | 51                |
| Too much acid ***                          | 18 <sup>a</sup>   | 24 <sup>abc</sup> | 36 <sup>cd</sup>  | 18 <sup>a</sup>  | 23 <sup>ab</sup>  | 19 <sup>a</sup>   | 43 <sup>d</sup>   | 35 <sup>bcd</sup> |
| Not enough sweet <sup>ns</sup>             | 48                | 47                | 39                | 43               | 40                | 43                | 44                | 51                |
| Bland /no taste <sup>ns</sup>              | 34                | 36                | 22                | 41               | 33                | 32                | 28                | 33                |
| Not pleasant aftertaste <sup>ns</sup>      | 29                | 35                | 33                | 32               | 30                | 32                | 38                | 30                |
| Pleasant aroma <sup>ns</sup>               | 66                | 59                | 69                | 64               | 68                | 69                | 64                | 65                |
| Aromatic/strong aroma <sup>ns</sup>        | 56                | 47                | 53                | 46               | 49                | 53                | 56                | 52                |

Aurea (AUR), Cauralina (CAU), Maillane (MAI), Marmande (MAR), Marbonne (MNE), Pera de Girona (PDG), Pomodoro di Sorrento (PDS), Valenciana (VAL). Traditional varieties are in grey.

Values within a row with common letters are not significantly different ( $p \leq 0.05$ ). Multiple pairwise comparisons based on McNemar test. When a mean is followed by four or more letters, the range of letters is indicated. Asterisks indicate significant differences according to Cochran's Q test at \* $p \leq 0.05$ , \*\* $p \leq 0.01$ , \*\*\* $p \leq 0.001$ , while ns indicates non-significant differences between samples.
